# 1 Mitochondrial interactome remodeling in aging mouse skeletal 2 muscle associated with functional decline.

3 Anna A. Bakhtina<sup>1\*</sup>, Gavin Pharaoh<sup>2\*</sup>, Andrew D. Keller<sup>1</sup>, Rudy Stuppard<sup>2</sup>, David J. Marcinek<sup>2\*\*</sup>, James E.  
4 Bruce<sup>1\*\*</sup>

5 1. Department of Genome Sciences, University of Washington, Seattle, WA  
6 2. Department of Radiology, University of Washington, Seattle, WA

7 \* These authors contributed equally

8 \*\* Co-corresponding authors

## 9 Abstract

10 Genomic, transcriptomic, and proteomic approaches have been employed to gain insight into molecular  
11 underpinnings of aging in laboratory animals and in humans. However, protein function in biological  
12 systems is under complex regulation and includes factors in addition to abundance levels, such as  
13 modifications, localization, conformation, and protein-protein interactions. We have applied new  
14 robust quantitative chemical cross-linking technologies to uncover changes muscle mitochondrial  
15 interactome contributing to functional decline in aging. Statistically significant age-related changes in  
16 protein cross-link levels relating to assembly of electron transport system complexes I and IV, activity of  
17 glutamate dehydrogenase, and coenzyme-A binding in fatty acid beta-oxidation and TCA enzymes were  
18 observed. These changes showed remarkable correlation with measured CI based respiration  
19 differences within the same young-old animal pairs, indicating these cross-link levels offer new  
20 molecular insight on commonly observed age-related phenotypic differences. Overall, these system-  
21 wide quantitative mitochondrial interactome data provide the first molecular-level insight on ETS  
22 complex and substrate utilization enzyme remodeling that occur during age-related mitochondrial  
23 dysfunction. Each observed cross-link can serve as a protein conformational or protein-protein  
24 interaction probe in future studies making this dataset a unique resource for many additional in-depth  
25 molecular studies that are needed to better understand complex molecular changes that occur with  
26 aging.

## 27 Key terms

28 mitochondria, protein-protein interactions, protein conformations, protein-ligand interactions,  
29 quantitative crosslinking mass spectrometry

## 30 Abbreviations

31 **ETS** Electron Transport System  
32 **TCA** Tricarboxylic acid  
33 **FAO** Fatty Acid Oxidation  
34 **LC-MS** Liquid Chromatography – Mass Spectrometry  
35 **ROS** Reactive Oxygen Species  
36 **ATP** Adenosine Triphosphate  
37 **qXL-MS** quantitative crosslinking mass spectrometry  
38 **iqPIR** isobaric quantitative protein interaction reporter  
39 **SCX** Strong Cation Exchange

40 **SH** Stump Heavy  
41 **RH** Reporter Heavy  
42 **GO** Gene Ontology  
43 **KEGG** Kyoto Encyclopedia of Genes and Genomes  
44 **CS** Citrate Synthase  
45

## 46 Main

47 Aging is a complex process involving several interconnected features that contribute to the progressive  
48 decline in function, vulnerability to chronic disease, and ultimately death.<sup>1</sup> Among the hallmarks of  
49 aging is mitochondrial dysfunction which was first proposed as a major component of aging in 1956.<sup>2</sup> In  
50 muscle, aging is accompanied by increasing decline in mass and strength. Decreases in mitochondrial  
51 function are thought to be primary mediators of age-related muscle loss.<sup>3</sup> Many phenotypes of aging  
52 have been observed in mitochondria including changes in reactive oxygen species (ROS) production,  
53 electron transport system (ETS) efficiency and respiration, ATP production, mitochondrial quality  
54 control, mitochondrial biogenesis, and mitophagy.<sup>4</sup> Mitochondrial function is among the most  
55 significant changes accompanying muscle aging on the cellular level.<sup>3,5,6</sup> Muscle mitochondria have been  
56 a primary focus of aging research due to their central role in maintaining metabolic and redox  
57 homeostasis, regulating metabolite levels, contribution of mitochondria to muscle function during  
58 exercise, and the relative ease of muscle biopsy in humans compared to other tissues. Genomic,  
59 transcriptomic, and proteomic approaches have been employed to study muscle aging in laboratory  
60 animals and in humans, including deep quantitative proteomic and transcriptomic profiling of several  
61 age groups in humans<sup>7,8</sup> and in mice.<sup>9-11</sup> However, protein function in biological systems is under  
62 complex regulation and includes factors in addition to abundance levels, such as modifications,  
63 localization, conformations, and protein-protein interactions. While large-scale studies have also been  
64 applied to investigate differential mitochondrial protein modifications with age, including  
65 phosphorylation, acetylation, succinylation and others,<sup>12-14</sup> quantitation of large-scale changes in protein  
66 conformations and protein-protein interactions, collectively referred to here as the interactome, has  
67 previously not been possible.

68 Recently developed quantitative crosslinking mass spectrometry technologies (qXL-MS) were applied to  
69 elucidate interactome changes in aged murine skeletal muscle mitochondria that contribute to age-  
70 related mitochondrial functional decline. Reported here are results from initial investigations of murine  
71 muscle mitochondrial interactomes that enable identification of statistically significant changes  
72 associated with aging. Newly advanced isobaric quantitative protein interaction reporter (iqPIR)  
73 technologies<sup>15</sup> enabled reproducible detection of age-related mitochondrial interactome changes.  
74 Muscle mitochondria from young and old mice were isolated and cross-linked with iqPIR molecules.  
75 Young and old mitochondrial samples were paired, processed, and analyzed to quantify age-related  
76 mitochondrial interactome changes. Before the cross-linking, mitochondrial protein yield was  
77 measured, together with functional measurements such as oxygen consumption rates on Complex I and  
78 Complex II substrates, and citrate synthase activity (**Fig. 1**). This allowed the initial correlation to be  
79 made linking age-related mitochondrial phenotypic or functional changes with molecular level  
80 interactome remodeling. In addition to changes in protein-protein interactions, quantifying site-specific  
81 interaction of the iqPIR reporter molecules provides new insights into protein activity by identifying  
82 changes in 1) protein structure associated with activity, as in glutamate dehydrogenase, described

83 below and 2) substrate binding to protein active sites. Among these data, significant age-related  
 84 decreases in cross-link levels within the antenna domain of glutamate dehydrogenase (DHE3) were  
 85 observed that are correlated with decrease in glutamate and malate driven respiration. Similarly,  
 86 complex I late-stage assembly and binding of NDUA4 subunit to the rest of complex IV was also impaired  
 87 and correlated with decrease in complex I respiration. Traditional methods, such as blue native gels (BN-  
 88 PAGE) are able to distinguish large assemblies, but lack resolution to provide quantitative differences  
 89 between late stage assemblies.<sup>16</sup> Moreover, BN-PAGE can only enable visualization of complexes that  
 90 survive extraction and interactions of ETS complex subunits like NDUA4 appear highly dependent on  
 91 extraction conditions. Thus, qXL-MS is uniquely suited to study changes in complex assembly and  
 92 composition and provide new biological insight on ETS dysregulation observed with aging. Finally, as has  
 93 been previously shown with qXL-MS data,<sup>17</sup> each identified link can be targeted with PRM methods in  
 94 other labs to visualize conformational and interactome changes with many other perturbations or  
 95 interventions. Therefore, in addition to the new biological insight on large-scale age-related protein  
 96 conformation and interaction changes discussed below, these new quantitative interactome data can  
 97 serve as a resource for many additional studies to better visualize molecular changes that underpin age-  
 98 related mitochondrial functional decline.

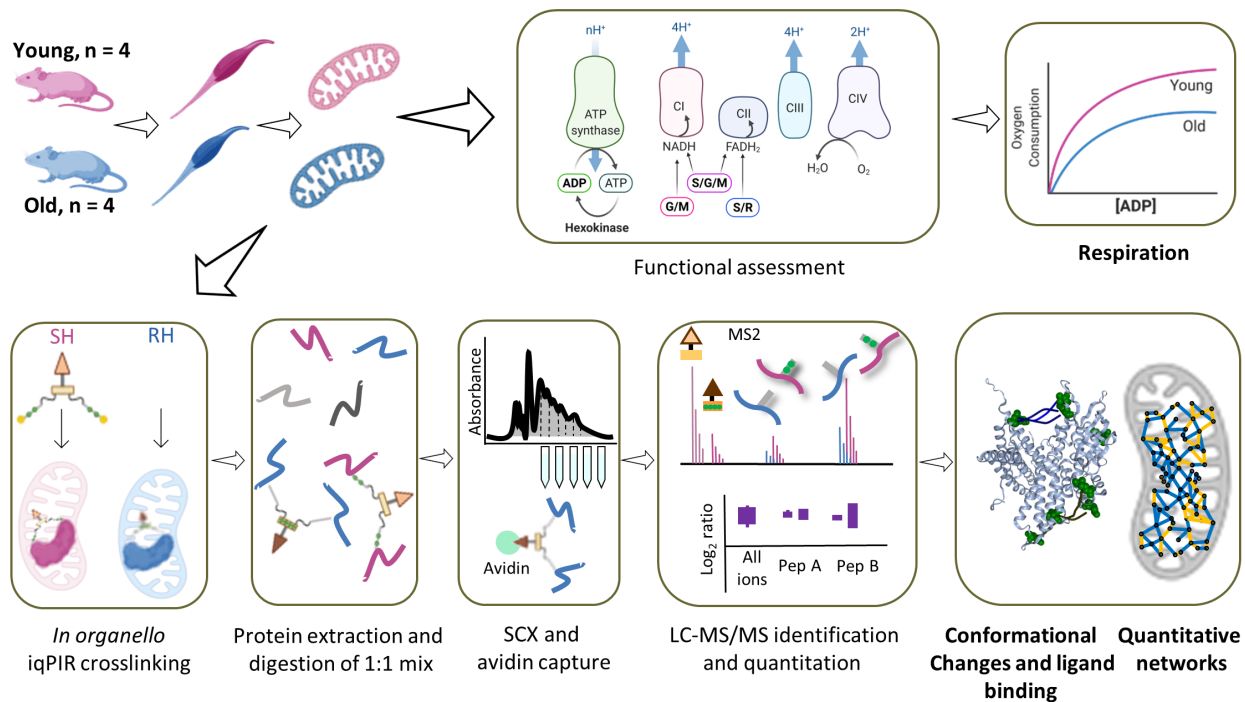

99

100 **Figure 1. Experimental workflow.** Gastrocnemius muscle was excised from either young (6 months) or  
 101 old (30 months) mice and mitochondria were isolated. Each mitochondrial pellet was resuspended and  
 102 part of the homogenate was added to an oxygen electrode to measure oxygen consumption for complex  
 103 I: glutamate and malate (G/M), complex II: succinate and rotenone for inhibiting complex I (S/R), and  
 104 both complexes: succinate, glutamate, and malate (S/G/M). Mitochondria from the same homogenate  
 105 were then crosslinked with binary iqPIR reagents: mitochondria from old mice were crosslinked with  
 106 reporter heavy (RH) and mitochondria from young mice were crosslinked with stump heavy (SH) iqPIR  
 107 molecules. Mitochondria were then lysed, proteins were reduced, alkylated, and mixed in a 1:1 ratio  
 108 based on total protein mass for each young old mouse pair and digested with trypsin overnight. Peptide

109 mixtures were then desalted, separated on an SCX column, and enriched for biotinylated peptides with  
110 monomeric avidin. Peptides were then separated by LC and MS2 spectra were collected for peptides  
111 with charge greater or equal to 4. The data were processed, and abundance of each crosslinked peptide  
112 pair was determined using newly developed iqPIR informatics.<sup>15</sup> The dataset was uploaded to XLinkDB<sup>18</sup>  
113 to view cross-linked peptides, quantitation, protein and complex structures and networks among other  
114 dataset features.

## 115 Results

### 116 **Generation of mitochondrial interactome of aged muscle**

117 In total, 1864 cross-linked peptide pairs, hereafter referred to as cross-links, were identified from 4  
118 biological replicates of pairwise combinations of 4 old (30 months) and 4 young (6 months) mice at 1%  
119 cross-link level FDR (**Supp. Table 1** and  
120 [http://xlinkdb.gs.washington.edu/xlinkdb/Interactome\\_of\\_aged\\_muscle\\_mitochondria.php](http://xlinkdb.gs.washington.edu/xlinkdb/Interactome_of_aged_muscle_mitochondria.php)). 533 cross-  
121 links are interprotein (formed by lysine residues originating from two distinct proteins) and 1331 are  
122 intraprotein (from the same protein). Mapping all identified intralinks on to recently predicted  
123 structures<sup>19</sup> shows that 931 (89%), the overwhelming majority of intralinks, are in agreement with the  
124 models: Euclidean distances between alpha carbons of cross-linked lysine residues are less than or  
125 equal to 35 angstroms (**Fig. S1a**). Interlinks are formed between two proximal proteins, so it is expected  
126 that these two proteins are localized together within mitochondria. 80% (393) of identified interlinks are  
127 between inner membrane associated proteins and only two interlinks are between proteins that are not  
128 expected to colocalize (matrix and outer membrane) based on submitochondrial localization  
129 information from Mitocarta 3.0 with each pair of interlinked proteins (**Fig. 2a**).<sup>20</sup>

130 Median normalized log<sub>2</sub> ratios of confidently quantified crosslinks (no more than 1 missing value across  
131 biological replicates and 95% confidence < 0.5) in aged mitochondria compared to young, follow normal  
132 distribution, except biological replicate 4 (**Fig. 2b**). To produce log<sub>2</sub> ratio for a given cross-link, it must be  
133 present in both channels in a pair: reporter heavy (RH) cross-link in old sample and stump heavy (SH)  
134 cross-link in young. On average, 1156 cross-links are quantified in each replicate (1229, 1099, 1001,  
135 1297 respective), meaning that the majority of the cross-links were formed in both samples, making it  
136 unlikely to form by chance. The quantitation derived with iqPIR technologies and informatics showed  
137 excellent reproducibility based on observed pairwise Pearson's R values between 0.5 and 0.76 (**Fig. 2c**).  
138 In addition, redundancy in cross-link quantitation exists in some cases because multiple peptide  
139 sequences with redundant linkage can be formed during sample processing due to trypsin missed  
140 cleavage events during digestion or from methionine oxidation. These cases offer internal quality  
141 control on quantitation. Log<sub>2</sub> ratios for such multiple cross-links generally show excellent agreement  
142 (**Fig. S1b**) and further increase confidence in quantitation for a residue pair. Cross-links quantified in  
143 every sample show remarkable agreement across the four biological replicates (**Fig. 2d**) and  
144 reproducibility and robustness of quantitative values produced by the iqPIR method enabled  
145 identification of cross-links that exhibit statistically significant changes (Bonferroni corrected p ≤ 0.05) in  
146 aging mitochondria (**Fig. 2e**). Analysis of KEGG pathways and GO biological processes show enrichment  
147 in proteins involved in glutamate metabolism, TCA cycle, and oxidative phosphorylation (**Fig. 2f** and **Fig.**  
148 **S1g**). As expected, the total mitochondrial protein recovered from each gastrocnemius following  
149 isolation was lower in aged samples due to muscle atrophy and decreased input (**Fig. 2g**). However,  
150 citrate synthase (CS) activity was significantly increased following mitochondrial enrichment in aged

151 samples (**Fig. 2h**). This finding is consistently reported in the literature, and CS activity is a better metric  
152 of mitochondrial content when comparing across ages than mitochondrial protein content<sup>21</sup> in enriched  
153 fractions. Respiration rates in aged mitochondria are significantly decreased when expressed per CS  
154 activity (**Fig. 2i, S1f**).

155 Quantified cross-linked peptide levels are a product of protein, post-translational modifications,  
156 conformation and protein interaction level changes. Observed change in a particular cross-link  
157 abundance can reflect changes on one or all these levels, unlike traditional proteomics methods that  
158 require separate sample preparation, mass spectrometry data acquisition and downstream data  
159 processing. We can leverage the entirety of quantified cross-links for each protein or protein pair to  
160 make a conclusion regarding which level of regulation is more likely. For example, more than 20  
161 intralinks were quantified from glycerol-3-phosphate dehydrogenase (GPDM) and all are decreased in  
162 aged mitochondria (**Fig. S1c**). GPDM is a ubiquinone oxidoreductase which together with its cytosolic  
163 counterpart bridges cytosolic energy production and the mitochondrial electron transport chain. High  
164 expression of GPDM has been linked to enhanced fatty acid oxidation and resistance to obesity in rats<sup>22</sup>,  
165 skeletal muscle regeneration in mice and in cell culture.<sup>23</sup> GPDM activity can be controlled either by  
166 expression levels of the proteins or by allosteric regulation<sup>24</sup> and consistent decrease in all GPDM cross-  
167 links with age most likely indicates lower GPDM levels. Currently no solved mammalian structure of  
168 GPDM exists, but the high agreement of cross-links and AlphaFold predicted structure show that cross-  
169 linking can be utilized in mechanistic studies for proteins with or without solved structures (**Fig. S1e**).  
170 We also observed global decrease of intralinks of MICOS complex proteins and interlinks between its  
171 subunits, especially Mic60 and Mic19 (**Fig. S1d**). MICOS complexes establish and regulate cristae  
172 morphology and are required for oxidative phosphorylation. The importance of Mic60 and Mic19 and  
173 their interaction for MICOS assembly and stabilization has been shown previously and aberrant cristae  
174 morphology is a feature of many human pathologies and aging.<sup>25,26</sup> However, deeper insight regarding  
175 age-related conformational and protein interaction changes can be gained from proteins that display  
176 specific patterns of change in cross-link levels, allowing for a more detailed analysis.

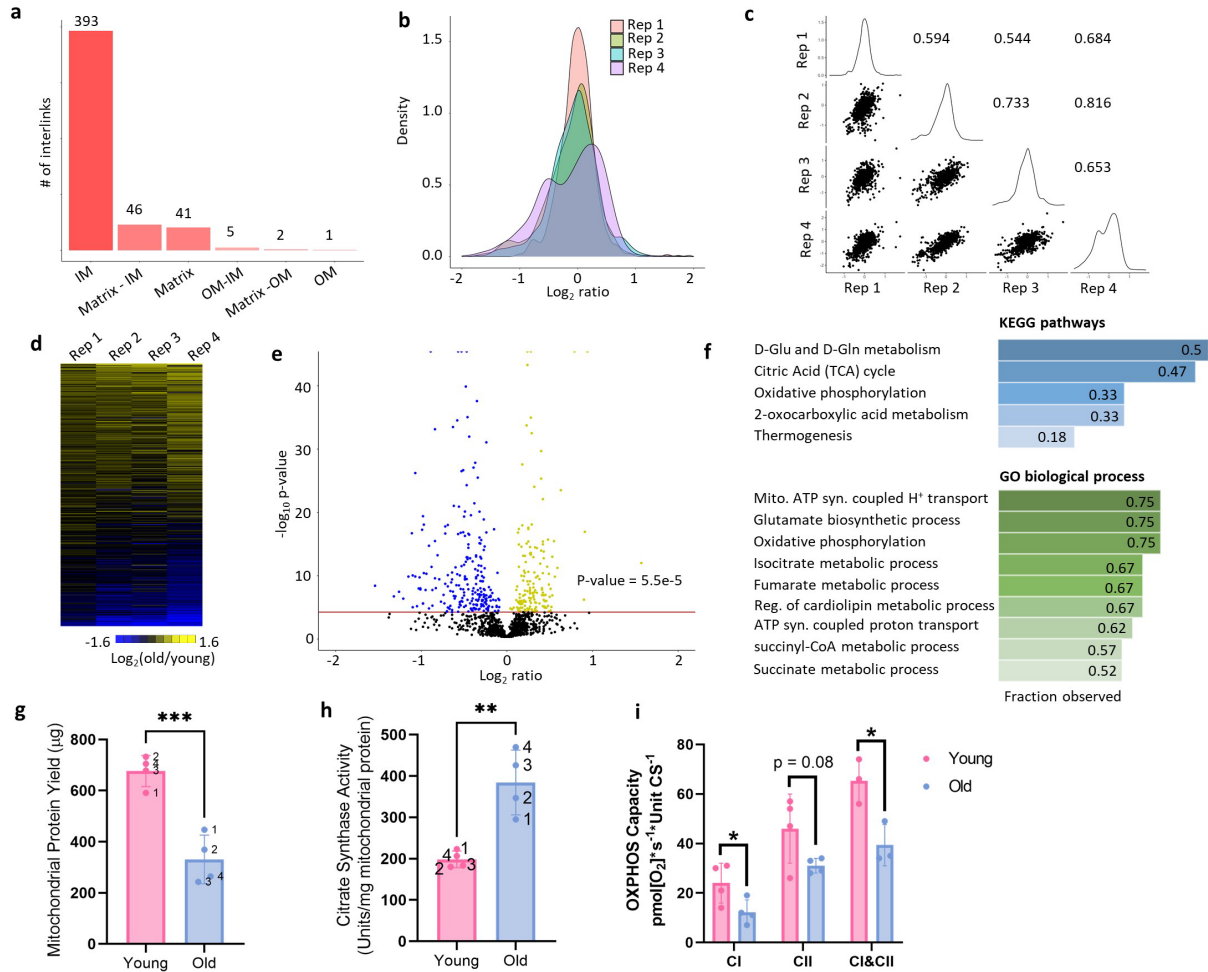

177

178 **Figure 2. Quantitative cross-linking enables detection of reproducible changes in the interactome of**  
 179 **aging mitochondria. a.** Sub-mitochondrial localization of protein pairs identified in interprotein links. **b.**  
 180 Distributions of log<sub>2</sub> ratios for each biological replicate. Pairwise correlation plots (**c**) with Pearson's R  
 181 R values between 0.54 and 0.81 and heat map (**d**) of log<sub>2</sub> ratios for cross-links with most reliable  
 182 quantitation (no missing values and 95% confidence interval < 0.5 for each ratio) show reliable and  
 183 reproducible quantitation of cross-links. **e.** Confidently quantified cross-links with significant changes  
 184 (Bonferroni corrected p-value < 0.05 from two-sided t-test). **f.** KEGG and GO Pathways enriched in the  
 185 cross-links with statistically significant changes. **g.** Yield of mitochondrial protein from both  
 186 gastrocnemius muscle and (**h**) Citrate Synthase (CS) activity. Each rep of young and old mitochondria is  
 187 denoted by a number next to the data point. **i.** Maximum oxidative phosphorylation (OXPHOS) capacity  
 188 of the electron transport chain from isolated mitochondria with complex I (CI) substrates (glutamate and  
 189 malate), complex II (CII) substrates (succinate and rotenone), or combined CI&CII substrates (glutamate,  
 190 malate, and succinate) measured as oxygen consumption rate (OCR) at saturating ADP concentrations  
 191 normalized to units of CS activity. \*p < 0.05, \*\*p < 0.01, \*\*\*p < 0.001.

## 192 **Complex I assembly and Complex IV integrity are impaired with age**

193 The present mitochondrial interactome studies resulted in identification of many cross-links originating  
 194 from electron transport system complexes and supercomplexes (SC) or respirasome interlinks.

195 Respiratory electron transport and complex I biogenesis have been reported as the top pathways  
196 affected in aging muscle on a transcriptome level but also the pathways that have the lowest correlation  
197 between transcript and protein levels, making the interpretation of its role in aging muscle more  
198 complicated.<sup>27</sup> Decreased NAD<sup>+</sup>/NADH is a hallmark of cell senescence and aging in muscle tissues and  
199 is driven in part by CI activity.<sup>28</sup> CI consists of a membrane embedded part and protruding matrix arm  
200 that each assemble independently.<sup>29</sup> In the matrix arm there are many interlinks as well as intralinks  
201 that are either unchanged or slightly increased in aged mitochondria. Conversely, the only matrix arm  
202 cross-links with age-related decrease are between NDUS1 and NDUV1 subunits (**Fig. 3 a,b**), yet all  
203 intralinks in each subunit are either unchanged or increased (**Fig. 3c**). Comparison of Log<sub>2</sub> ratios of  
204 NDUS1 – NDUV1 cross-links and log<sub>2</sub> ratios of intralinks from both proteins and their interlinks to other  
205 Complex I subunits revealed a statistical difference (p-value = 9.6\*10<sup>-6</sup>, Welch two-sample t-test  
206 excluding P1 from comparison and 1.35\*10<sup>-5</sup> with all 4 replicates, **Fig. 3d, S2c**). NDUS1 and NDUV1  
207 interlinks with other subunits in the matrix arm and intralinks in all CI subunits except for NDUA8 also do  
208 not change or show slight increase with age (**Fig. S2 a, b**). Two residues on NDUS1 (K84 and K87) were  
209 identified cross-linked to the same residue on NDUV1 (K81). One possible explanation for this  
210 observation could involve across-link change in post translational modification levels at NDUV1 K81  
211 since it is involved in both links with decreased levels. NDUV1 is a target for desuccinylation by SIRT5<sup>30</sup>  
212 and deacetylation by SIRT3<sup>31</sup>. However, if modification levels at a particular lysine were altered, one  
213 would expect that all quantified cross-links involving this residue will change accordingly, indicating a  
214 more or less accessible lysine due to the PTM. However, the NDUV1 intra-link (K81-K104) shows no  
215 age-related changes, indicating that increased modification of NDUV1 K81 cannot explain the decreased  
216 NDUS1-NDUV1 interlinks discussed above. NDUS1 and NDUV1 are among the last subunits to be  
217 incorporated in the complex and thus, this interaction is an indicator of fully assembled CI (**Fig. 3e**).<sup>32</sup> It is  
218 also close to flavin mononucleotide (FMN) binding which is a primary site of CI ROS production making  
219 these subunits especially vulnerable to ROS damage. The efficient way to replace damaged subunits and  
220 keep CI functioning is to replace just the necessary subunits instead assembling the whole complex from  
221 scratch. So, the N-module has been shown to have a different turnover rates and mechanisms from Q  
222 and P modules.<sup>33</sup> Taken together, these data indicate impaired assembly or turnover of N-module  
223 intermediate assembly in old mitochondria. Defects in complex I assembly have been shown to lead to  
224 increased production of superoxide and premature senescence, and lower abundance of matrix subunits  
225 can be a predictor of longevity.<sup>34</sup> Differential effects of aging on protein abundance and stability of  
226 matrix and membrane proteins of Complex I have been previously reported and is expected to lead to  
227 impaired assembly.<sup>35</sup> There have also been recent reports of coordinated assembly of ETC complexes.  
228 In particular, complex III was shown to mediate complex I assembly.<sup>36</sup> CIII deficiency led to stalling of CI  
229 assembly, especially incorporation of the N-Module. Interlinks between complex I and complex III as  
230 well as several complex III subunits are also decrease in aged mitochondria (**Fig. S2 e, f**).

231 Interlinks between complex IV subunits CX6B1 and NDUA4 were among the cross-links in the dataset  
232 that exhibited the largest age-related level decreases(**Fig. 3f, g**). NDUA4 is a small subunit that has been  
233 identified to be a subunit of Complex IV rather than complex I as previously thought.<sup>37</sup> NDUA4 is not  
234 required for CIV assembly and CIV is functional without it, but loss of NDUA4 impairs CIV activity.<sup>38</sup> No  
235 NDUA4 intralinks were quantified in this study, but comparing NDUA4-CX6B1 interlinks to CX6B1  
236 intralinks revealed statistically significant decreases of interprotein link levels, p-value = 5.9\*10<sup>-6</sup>  
237 excluding P1 from comparison and 0.03 with all 4 replicates (**Fig. 3h and S2d**) indicating reduced  
238 interaction between these subunits rather than reduced complex IV levels. Recently, structural

239 characterization of CIV containing NDU4 subunits has been shown possible by judicious choice of  
240 complex extraction/purification conditions<sup>38</sup> revealing NDU4 resides at the CIV homodimer interface  
241 and precludes CIV homodimer formation.<sup>37</sup> Moreover, Balsa et al showed that stable knock down of  
242 NDU4 reduced both the activity and stability of CIV that could be rescued by myc-NDU4 expression.<sup>37</sup>  
243 Therefore, the observed reduction of NDU4-CIV interaction indicated by reduction in multiple NDU4-  
244 CX6B1 cross-link levels would be expected to decrease CIV stability and activity in mitochondria from old  
245 mice. The precise role of NDU4 and its effect on complex IV is not yet clear and is a subject of ongoing  
246 research: a recent report shows replacement of NDU4 in CIV by NMSE1 (**Fig. S2g**), another small  
247 protein, during inflammation, while NDU4 is degraded by miRNA.

248 For both complex I and IV links discussed previously, biological replicate one (P1) deviates from other  
249 replicates, showing little or no age-related change in these cross-links (Fig. 3b, g). Overall, CI-linked  
250 respiration declined significantly in aged samples (Fig. 2g). Notably however, the aged sample from P1  
251 had no apparent decline in CI-linked respiration compared to young control, which coincides with this  
252 pair having reduced changes in CI protein interactions (**Fig. 3i**). Intriguingly, the magnitude of change in  
253 the CI assembly cross-links and CX6B1-NDU4 cross-links in CIV showed strong correlation with the  
254 decline in respiration on complex I substrates across all sample pairs: Pearson's  $R^2$  0.63 and 0.95  
255 respectively, while showing no correlation with complex II respiration (**Supp. Table 3 and Fig. 3j and S2**  
256 **h**).



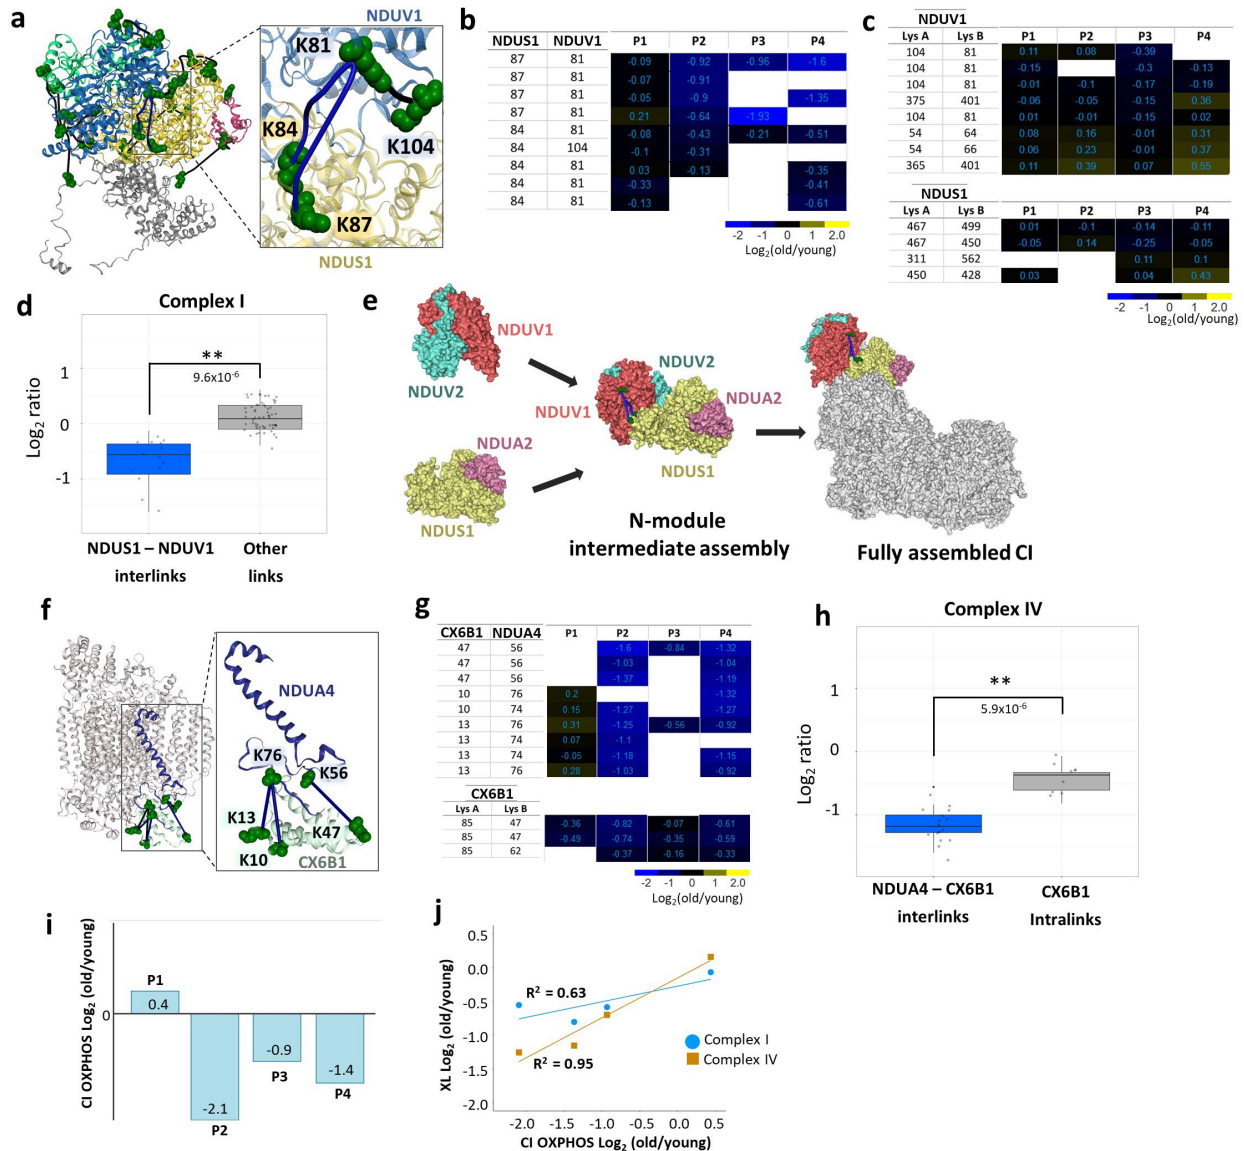

257  
 258 **Figure 3. Assembly of Complex I and Complex IV integrity is affected in aging muscle.** **a.** Decreased  
 259 interprotein cross-links between Nduv1 and Ndu1 mapped to Complex I structure (PDB 6G72) are  
 260 shown in blue and non-changing intralinks are shown in black. **b.** Heatmap of log<sub>2</sub> ratios of NDUS1-  
 261 NDUV1 cross-linked peptide pairs for each biological replicate (P1, P2, P3, P4). **c.** Heatmap of log<sub>2</sub> ratios  
 262 of intraprotein cross-linked peptides from NDUS1 and NDUV1. **d.** Boxplots of cross-linked peptide pairs  
 263 in biological replicates P2, P3, P4 with Welch's t-test p-value < 0.01 show statistically significant  
 264 difference between NDUS1-NDUV1 interlinks and intralinks and interlinks to other Complex I subunits. **e.**  
 265 N-module is assembled from subcomplexes NDUV1-NDUV2 and NDUS1-NDUA2 at the end of whole  
 266 complex I assembly. **f.** NDUA4-CX6B1 interlinks mapped to a CIV structure (PDB 5Z62). **g.** Heatmap of  
 267 log<sub>2</sub> ratios of cross-linked peptide pairs between NDUA4 and CX6B1 (top) and CX6B1 intralinks (bottom).  
 268 **H.** Boxplots of cross-linked peptide pairs in biological replicates P2, P3, P4 with Welch's t-test p-value <  
 269 0.01 show statistically significant difference between NDUA4-CX6B1 interlinks and Cox6b1 intralinks. **i.**  
 270 Log<sub>2</sub> fold change of CI linked oxidative phosphorylation in old samples compared to young for each pair.

271 j. Correlation plots between average  $\log_2$  ratios of complex I (blue circles) or complex IV (orange  
272 squares) cross-links changing with age and  $\log_2$  fold change in Complex I respiration for each pair.

### 273 **Glutamate dehydrogenase (DHE3) cross-links associated with activation are decreased in aging**

274 Glutamate dehydrogenase (DHE3) is an enzyme responsible for interconversion of glutamate and alpha-  
275 ketoglutarate and is encoded by *glud1* gene. A primary DHE3 function *in vivo* is thought to involve  
276 catalysis of oxidative deamination of glutamate to produce ammonia and alpha-ketoglutarate.<sup>39</sup> Alpha-  
277 ketoglutarate is a TCA cycle intermediate, but it is also involved in regulation of many cellular processes  
278 outside of the TCA cycle, such as epigenetic regulation, protein hydroxylation and ATP synthase  
279 regulation (**Fig. 4a**). Connection between DHE3 glycation levels to liver aging has been reported  
280 before,<sup>40</sup> but DHE3 abundance levels have not previously been correlated with aging in muscle. In  
281 agreement with that notion, two DHE3 intralink levels were quantified that were unchanged in any of  
282 the biological replicates, indicating that the protein abundance levels of DHE3 were not altered with  
283 age. Glutamate dehydrogenase exists as a hexamer, comprised of a dimer of trimers, and is a subject of  
284 intricate and diverse regulatory mechanisms.<sup>41</sup> Each trimer forms a protruding structure where helices  
285 from all three subunits form an “antenna” with largely unknown function. This antenna is only present  
286 in higher organisms and coevolved with the complex regulatory network of DHE3,<sup>42</sup> suggesting the  
287 antenna may serve in a regulatory capacity. Decreased homodimeric links in the DHE3 antenna region  
288 were among the largest decreased age-related changes quantified in the present study (**Fig 4b and 3Sa**).  
289 These included multiple cross-linked peptide pairs arising from missed cleavage products and were  
290 observed in all biological replicates, with more moderated changes in P1 where functional decreases  
291 were also moderated (**Fig. 4c, d and 3Sb**). DHE3 forms an abortive complex upon substrate binding and  
292 release of the abortive complex ((DHE3\*NAD(P)H\*Glu) is facilitated by ADP.<sup>41</sup> Since ADP serves as an  
293 activator of glutamate dehydrogenase, quantitative cross-linking experiments were also performed with  
294 mitochondria isolated from HEK293 cells comparing ADP-treated and control untreated mitochondria.  
295 These experiments revealed strong increases in DHE3 antenna homodimer links in both biological  
296 replicates (**Fig. 4e and 3Se**). An intralink spanning the substrate binding pocket (K171-K352) was also  
297 observed with increased level in one of the biological replicates. The combination of ADP-stimulation  
298 with old/young interactome data suggests the possibility that DHE3 activity is repressed in aged muscle  
299 mitochondria. If so, this may contribute to the observed reduced malate and glutamate stimulated  
300 respiration in mitochondria from aged muscle (Fig. 2i). DHE3 is essential for delivery of NADH to  
301 complex I during glutamate/malate stimulated respiration and the magnitude of decrease in antenna  
302 links correlates with change in Complex I respiration and show no correlation with respiration on  
303 complex II (Supp. Table 3 and **Fig. 4f and S3 f**).

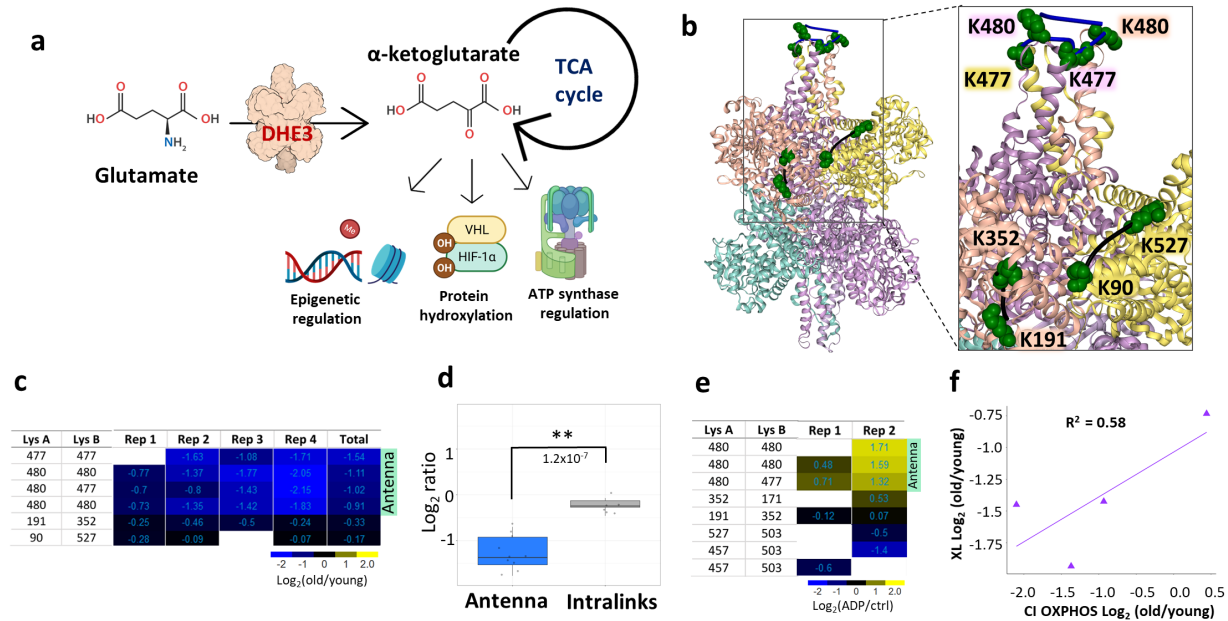

304

305 **Figure 4. Cross-link levels associated with glutamate dehydrogenase (DHE3) activation are decreased**  
 306 **in aged mitochondria.** **a.** Glutamate dehydrogenase converts glutamate to  $\alpha$ -ketoglutarate, a TCA cycle  
 307 intermediate that is involved in many cellular processes. **b.** Glutamate dehydrogenase cross-links  
 308 quantified in aging mouse mitochondria; non-changing intralinks are shown in black and decreasing links  
 309 in the “antenna” (K477-K477, K477-K480, K480-K480) mapped to one of the trimers in the hexamer  
 310 (bovine structure 6DHM) are shown in blue. **c.**  $\text{Log}_2(\text{old/young})$  ratio for each cross-linked peptide pair in  
 311 each biological replicate is summarized in heatmap. **d.** Boxplots of “antenna” ratios and other intralink  
 312 ratios with Welch two-sided t-test p-value. **e.** Heatmap of cross-linked peptide pairs quantified in 2  
 313 biological replicates of ADP treated HEK293 mitochondria. **f.** Correlation between average  $\text{log}_2$  ratio for  
 314 DHE3 antenna cross-links and CI respiration.

315

### 316 **FAO and TCA cycle enzymes show less accessible substrate binding sites.**

317 Impairment of fatty acid metabolism with aging has been shown in multiple organs and models. Aging  
 318 mouse heart has a decreased free fatty acid flux, TCA cycle flux, and insulin stimulated anaplerosis.<sup>43</sup>  
 319 Levels of free fatty acids in blood plasma are decreasing with aging while triglyceride levels are  
 320 increased.<sup>44</sup> In addition, muscle contraction leads to a shift in fatty acid oxidation (FAO) and TCA cycle  
 321 substrate flux and muscle recovery from contraction is impaired with age.<sup>45</sup> FAO and TCA cycle  
 322 substrates and intermediates show strikingly different patterns in old mice after the unloading and  
 323 following recovery compared to young mice. Surprisingly though, transcript levels of the proteins  
 324 involved do not show significant differences, confounding understanding of the mechanisms underlying  
 325 the changed FAO and TCA cycle fluxes. Many cross-linked peptides from several FAO and TCA enzymes  
 326 were quantified in this study, including ACADV, THIL, SUCA and SUCB. ACADV, encoded by *acadvl*, very  
 327 long-chain acyl-CoA dehydrogenase, catalyzes the first step in beta oxidation (**Fig. 5a**). Although the  
 328 majority of ACADV Intralinks showed a slight increase in aged mitochondria, indicating possibly slightly  
 329 elevated protein levels, a subset of four links were significantly decreased in aged muscle mitochondria  
 330 (**Fig. 5b, h and S4c**). All decreased ACADV links span the binding pocket of fatty acyl-CoA and involve

331 residue K279. The ACADV structure PDB: 2IX5 which contains CoA illustrates that CoA phosphate groups  
332 reside within salt bridge formation distance from K279 (Fig. 5A) suggesting that binding of CoA would  
333 reduce link formation at this residue. A similar situation was observed with a subset of 8 cross-link  
334 levels (out of 18) quantified in the enzyme THIL, encoded by *acat1*, which catalyzes the final FAO step,  
335 that showed significant age-related decrease. These link level changes contrast with the remaining 10  
336 THIL cross-links that either slightly increased or showed no change with age. Of the 8 THIL cross-links  
337 that decreased with age, 2 span the CoA binding site and K260 which is also within saltbridge distance  
338 with CoA phosphate groups as shown (Fig. 5c, d, i). Ligand binding can affect cross-link levels within  
339 mitochondria as we demonstrated above; both ACADV and THIL age-related decreased links appear  
340 statistically enriched in regions involved in ligand binding indicating age-related differences in FAO exist,  
341 despite no significant changes in enzyme levels. THIL functions as a tetramer and tetramer formation is  
342 linked to higher activity and cancer progression.<sup>46</sup> We observed decrease in the homodimeric links  
343 indicating decreased levels of active tetramer.

344 The final product of FAO, Acetyl-CoA, then enters the TCA cycle to produce NADH that can then be used  
345 by the ETS in oxidative phosphorylation. Significant changes in TCA cycle enzyme cross-link levels in  
346 aged mitochondria were also observed, including FUMH (Fig. S4 a, b), SUCA and SUCB1. The enzymes  
347 SUCA and SUCB1 are subunits of succinate-CoA ligase, which converts succinyl-CoA to succinate that is  
348 both a TCA cycle intermediate and an ETS substrate. Both SUCA and SUCB1 exhibited age-related  
349 decreased cross-link levels within ligand binding regions, including a cross-link at and nearby SUCA K90  
350 which is the SUCA CoA binding site (Fig. 5e). Succinyl-CoA ligase also produces ATP (or GTP in some  
351 other tissues) during generation of succinate, and a nucleotide binding pocket exists in SUCB1. A total of  
352 4 intra-links in SUCB1 were observed with age-related decreased levels, all including K143 cross-links  
353 that span the nucleotide binding pocket (Fig. 5f). Moreover, K108 and K98 in these decreased links exist  
354 within a distance compatible with salt bridge formation with GTP phosphate groups as shown in the pig  
355 crystal structure (PDB:2FP4). Since other SUCB links appear unchanged with age (Fig. 5g), these results  
356 indicate that age-related conformation differences within the ligand binding sites and not changes in  
357 protein levels mediate the observed changes in succinate-CoA ligase. Indeed, with consideration of the  
358 entire group of links, observed ratios of cross-links within both CoA and nucleotide binding regions  
359 appear significantly different from those in other succinate-CoA ligase regions (Fig. 5j). Although the  
360 present age-related changes were measured in young and old murine muscle mitochondria, Wu et al.,  
361 demonstrated that T cells from rheumatoid arthritis (RA) patients lack sufficient succinyl-CoA ligase  
362 activity to maintain balanced TCA cycle metabolic intermediates, implicating acetyl-CoA in controlling  
363 pro-inflammatory T cells in autoimmune disease.<sup>47</sup> The cross-links identified in the present interactome  
364 data offer new opportunities to investigate succinyl-CoA conformational regulation in RA and possibly  
365 many other autoimmune diseases in ways not previously possible. Taken together, these results  
366 indicate that considerable remodeling of FAO and TCA enzymes occur with aging, yet these appear to  
367 not be regulated at the protein level, but rather through conformational differences.

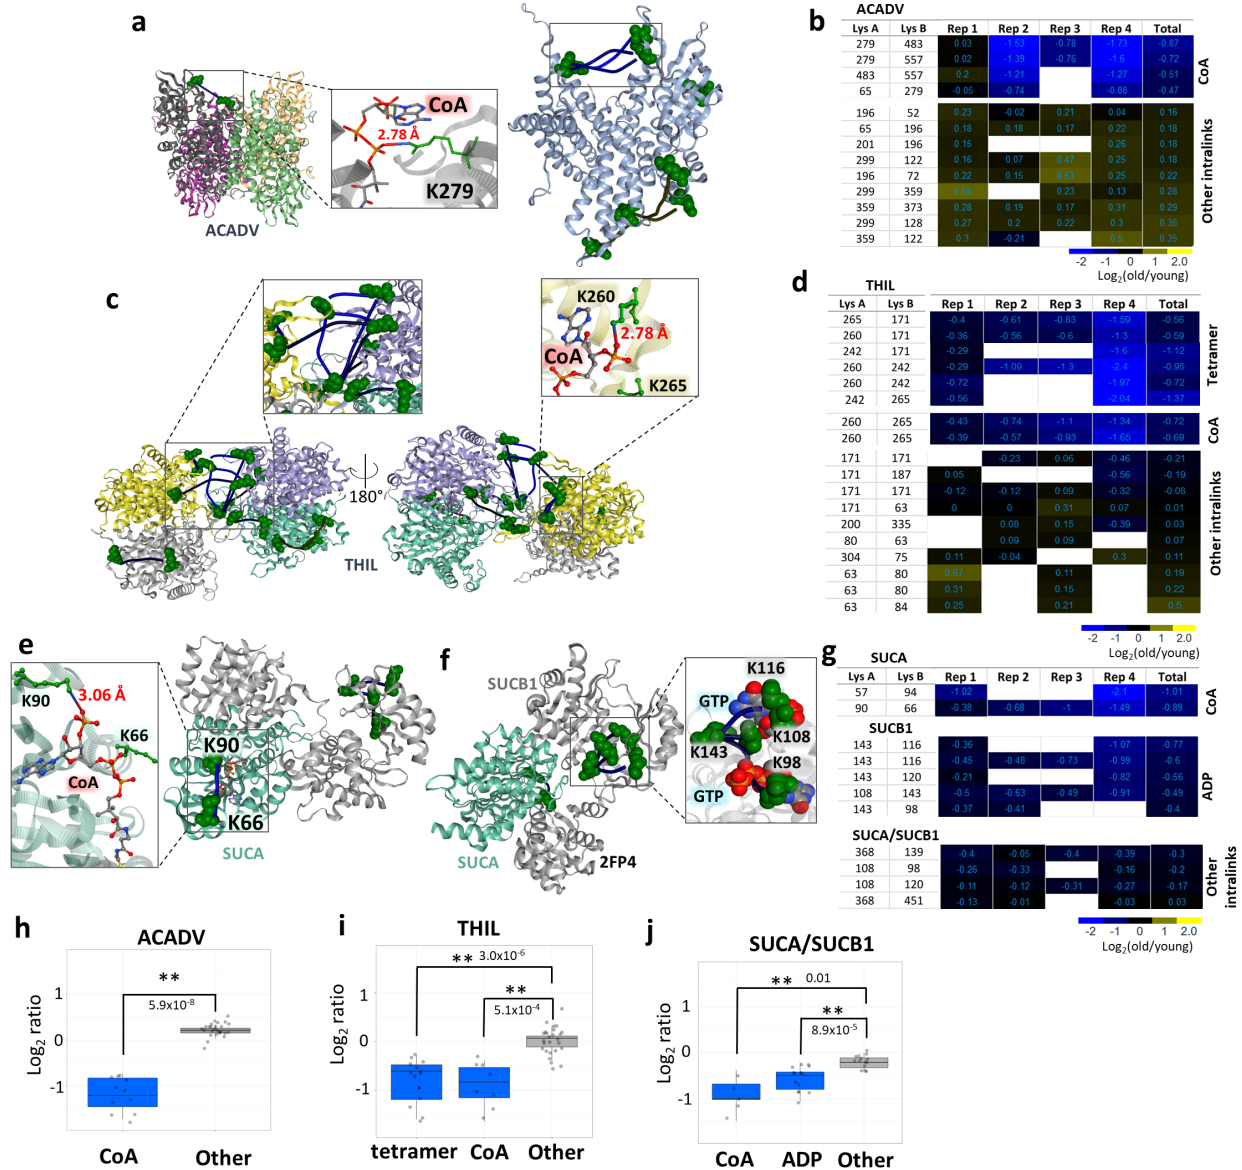

368

369 **Figure 5. TCA cycle and FA beta oxidation.** **a.** ACADV cross-link at the CoA binding site mapped to  
370 *A. Thaliana* structure, a short chain specific acyl-CoA oxidase in complex with acetoacetyl-CoA (2IX5, left)  
371 and all cross-links mapped on a human structure with cross-links at CoA binding site in the box (2UXW,  
372 right). CoA from acetoacetyl-CoA is within the distance to form hydrogen bonds with side-chain  
373 nitrogen of K279. **b.** Heatmap of log2 ratios of all ACADV cross-linked peptide pairs. **c.** THIL cross-links  
374 mapped to a human structure (2IB8) with zoomed in tetrameric links (left). Cross-links at the CoA  
375 binding site were also mapped on a human structure crystalized with CoA (2F2S) showing that K260 is  
376 within the salt bridge bond formation distance (right zoomed in panel). **d.** Heatmap of log2 ratios of THIL  
377 cross-linked peptide pairs. **e.** Succinyl-CoA ligase cross-links mapped on a pig structure of GTP specific  
378 succinyl-CoA (4XX0) crystalized with inset view of CoA proximity to SUCA K90. **f.** Succinyl-CoA ligase  
379 cross-links spanning ATP/GTP binding site mapped to a pig GTP specific structure (2FP4). **g.** Heatmap of  
380 succinyl-CoA ligase cross-links. **h, i, j.** Boxplots comparing decreased cross-link levels at specific sites to  
381 log2 ratios of all other intralinks for ACADV, THIL, and SUCA/SUCB1.

## 382 Discussion

383 Large-scale capture of quantitative changes in the mitochondrial interactome together with functional  
384 measurements provide new molecular insights on age-associated functional decline in bioenergetics and  
385 metabolism. While previous transcriptome and proteome studies have provided unparalleled ability to  
386 visualize molecular abundance level regulation important in aging, it is clear other regulatory  
387 mechanisms beyond protein abundance levels are also involved. The approach presented here  
388 combines quantitation of protein, conformation, modification, ligand binding, and protein interaction  
389 levels to provide new biological insight on age-related molecular changes. Recently, the importance of  
390 studying protein interaction and their role in aging has been brought to the community attention.<sup>48</sup>  
391 While this initial study is non-comprehensive, these efforts have yielded the largest quantitative  
392 interactome dataset to define age-related mitochondrial differences thus far and include 1521  
393 quantified cross-links.

394 To date, changes in glutamate dehydrogenase mRNA or protein levels with aging have not been  
395 reported and the studies presented here are consistent with that finding. However, the present  
396 quantitative cross-linking data generate new insights on DHE3 interactions in mitochondria and age-  
397 related conformational differences that may functionally contribute to age-associated changes  
398 connecting TCA cycle, ETS and alpha-ketoglutarate (αKG) effects on lifespan. Multiple reports  
399 demonstrate αKG involvement in lifespan extension in mice<sup>49</sup>, flies<sup>50</sup>, yeast<sup>51</sup> and worms.<sup>52</sup> Increase in  
400 glutamate dehydrogenase activity has also been shown to accompany caloric restriction and subsequent  
401 increased lifespan.<sup>53</sup> Moreover, diet-based lifespan extension in flies appears to be dependent on DHE3  
402 expression.<sup>54</sup> Alpha-ketoglutarate also promotes myofibroblast differentiation through epigenetic  
403 regulation by driving histone demethylation and the role of anaplerotic supply from GLN and GLU has  
404 been highlighted.<sup>55</sup> The decreases in DHE3 antenna cross-link levels presented here are not resultant  
405 from protein level changes and indicate PTM and or conformational differences exist in aged muscle  
406 mitochondria. Age-related increase in PTM levels is possible since both cross-linked residues, K477 and  
407 K480 are targets of the sirtuins SIRT3 and SIRT5, with acetylation levels of these residues increasing  
408 more than 8 fold upon SIRT3 knock out.<sup>30,31,56</sup> However, cross-linked sites in the DHE antenna show  
409 both decrease levels in aged vs young mitochondria where glutamate respiration is repressed, and  
410 increased levels in ADP stimulated mitochondria where glutamate dehydrogenase activity is increased.  
411 In addition to the decrease in maximum glutamate stimulated complex I respiration, we also observed  
412 decreased maximum glutamate stimulated respiration and lower sensitivity of respiration to glutamate  
413 in aged male CB6F1 mice compared to young. (**Fig. S3 c, d**). This suggests that disrupted glutamate  
414 metabolism and the role of glutamate dehydrogenase is not strain or sex specific. Therefore, these  
415 antenna cross-link levels can serve as probes of glutamate dehydrogenase activity in many future  
416 studies, including those to help unravel Sirtuin-, diet-, or exercise-mediated lifespan or healthspan  
417 extension. For instance, quantitation of DHE3 antenna links prior to age-induced changes in  
418 mitochondrial function, with caloric restriction or other interventions can help elucidate pathways that  
419 mediate age-related reduction in glutamate respiration.

420 Quantitative cross-linking revealed changes in protein interactions and conformations affecting many  
421 facets of metabolism in aging muscle. Increased ROS production and alterations among ETS complexes  
422 in mitochondria are among the primary aspects under study to better understand age-related  
423 mitochondrial functional decline. ETS complexes, especially complex I, require coordinated and

424 controlled assembly to achieve functional maturity.<sup>57</sup> Therefore, disruption of the assembly uncovered  
425 in the present study should be investigated further to elucidate its role in ETC pathologies in aging.  
426 Altered activity and ligand binding in FAO and TCA cycle enzymes can bring to the forefront the  
427 contributions of TCA intermediates and fatty acid metabolism to aging phenotypes, connecting  
428 phenotypes and molecular remodeling.<sup>58-60</sup> Excitingly, we have already observed decreased sensitivity  
429 to fatty acids in the aged CB6F1 mice similarly to decreased sensitivity to glutamate (**Fig. S4 d, e**).

430 Taken together, these data enable a system-wide view of the changing mitochondrial interactome  
431 landscape linking changes in glutamate dehydrogenase activity together with amino acid metabolism,  
432 TCA cycle, and energy production by oxidative phosphorylation (**Fig. 6a**). All the age-related changes  
433 highlighted in this figure involve changes in protein conformations and interactions that are not readily  
434 attainable through conventional protein abundance level quantitation. Strikingly, many age-related  
435 interactome changes appear well-correlated to the severity of aging mitochondrial phenotype, as shown  
436 with pairwise CI oxygen consumption ratio compared with the magnitude of changes in protein  
437 conformations, interactions and ligand binding (**Fig. 6b**).

438 In the present manuscript, detailed discussion of only a small subset of cross-links was possible. K-  
439 means cluster analysis of all cross-links quantified in at least 2 biological replicates (95% conf.  $\leq 1$ )  
440 revealed that cross-links correlating with functional measurements cluster together and non-changing  
441 cross-links from these proteins are in a separate cluster together (**Fig. 6c, d**). Many other cross-links in  
442 these proteins display similar patterns to those discussed above with functional measurements,  
443 including proteins from the same pathways, such as ACSL1, CMC1, CPT1B, ATPB, and ATP5F1. The entire  
444 interactome dataset with quantitation, structures with mapped cross-links, and k-means clustering  
445 assignments is available to view online in XLinkDB  
446 ([http://xlinkdb.gs.washington.edu/xlinkdb/Interactome\\_of\\_aged\\_muscle\\_mitochondria.php](http://xlinkdb.gs.washington.edu/xlinkdb/Interactome_of_aged_muscle_mitochondria.php)). These  
447 data provide a unique, detailed, and quantitative view of mitochondrial aging in muscle that can be used  
448 to guide future studies unraveling molecular underpinnings of metabolism changes with age.

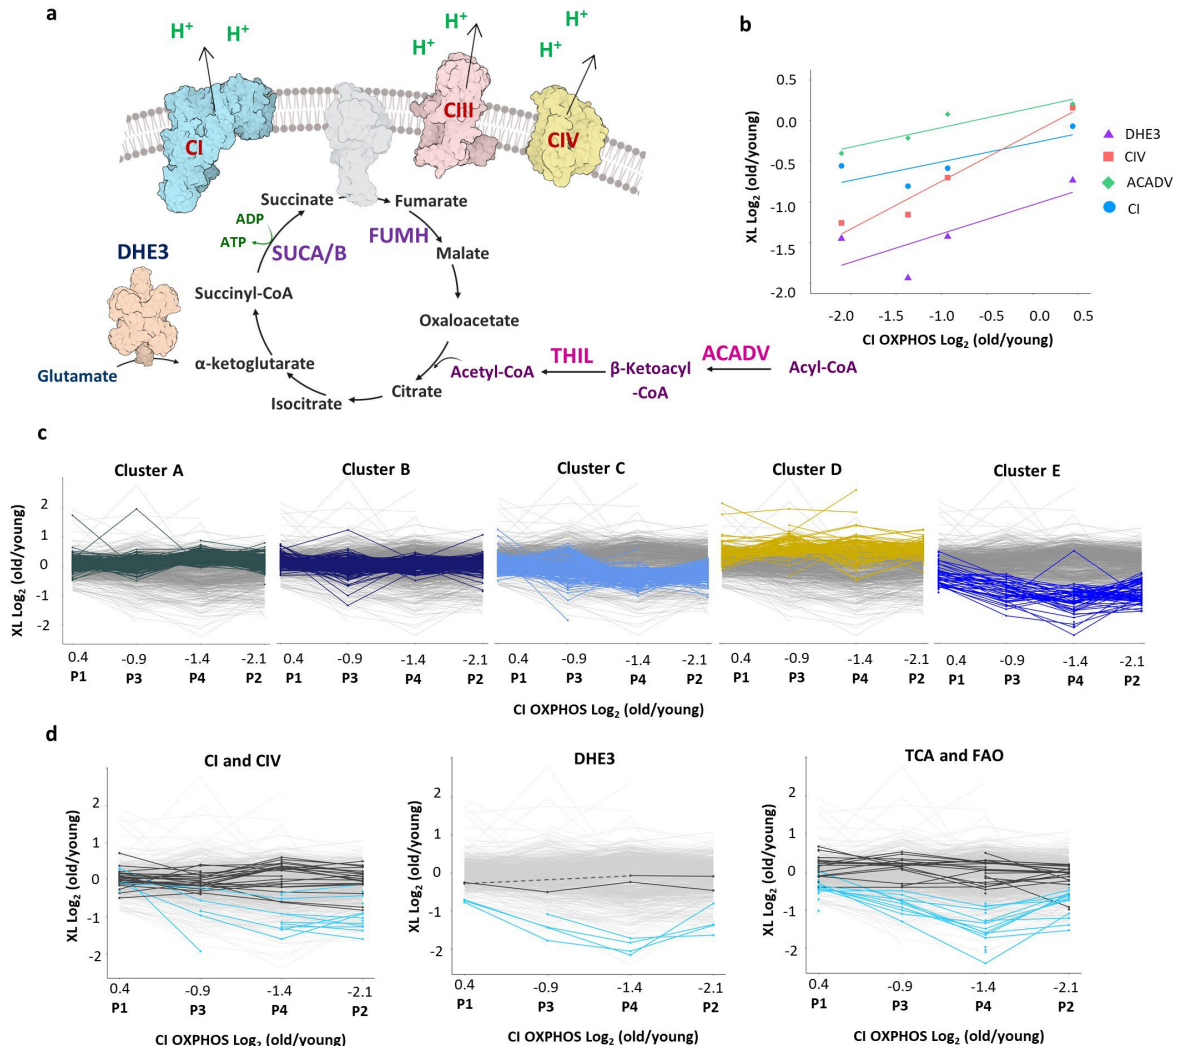

449

450 **Figure 6. Interactome remodeling associated with changes in muscle metabolism with aging. a.**

451 Integrated pathways with age-associated changes in protein-protein interactions, protein-ligand  
 452 interactions, or conformational changes highlighted in this study. **b.** Correlation between average of  $\log_2$   
 453 ratios in each biological replicate of cross-links changed with age in DHE3 (purple triangles,  $R^2=0.58$ ),  
 454 Complex IV (red squares,  $R^2=0.95$ ), ACADV (green rhombi,  $R^2=0.87$ ), Complex I (blue circles,  $R^2=0.63$ ) and  
 455 Complex I driven respiration. **c.** K-means clustering with 5 clusters. **d.** Crosslinks with age-related  
 456 changing levelsthat are discussed in this study (blue) cluster together (cluster E); non-changing crosslinks  
 457 from the same proteins are in dark grey

458

## 459 Methods

460 *Animal Husbandry.*

461 This study was reviewed and approved by the University of Washington Institutional Animal Care and  
 462 Use Committee. Female 6-month and 30-month-old C57BL/6J mice were received from the Jackson  
 463 Laboratory. All mice were maintained at 21 °C on a 14/10 light/dark cycle and given standard mouse



464 chow and water ad libitum with no deviation prior to or after experimental procedures. C57BL/6J  
465 animals were killed by cervical dislocation with no anesthetic. CB6F1 mice were euthanized with  
466 beuthanasia.

#### 467 *Mitochondrial Isolation.*

468 The gastrocnemius muscle was dissected, and mitochondrial isolation was performed by differential  
469 centrifugation. The whole muscle was homogenized using a high-speed drill on ice in a glass Dounce  
470 homogenizer in Mitochondria Isolation Buffer (210 mM Sucrose, 2 mM EGTA, 40 mM NaCl, 30 mM  
471 HEPES, pH 7.4). The homogenate was centrifuged at 900 x g at 4 °C for 10 minutes. The supernatant was  
472 collected and centrifuged at 10,000 x g at 4 °C for 10 minutes. The supernatant was removed, and the  
473 mitochondrial pellet was resuspended in ice-cold Respiration Buffer (RB) without taurine or bovine  
474 serum albumin (BSA) (1.5 mM EGTA, 3 mM MgCl<sub>2</sub>-6H<sub>2</sub>O, 10 mM KH<sub>2</sub>PO<sub>4</sub>, 20 mM HEPES, 110 mM  
475 Sucrose, 100 mM Mannitol, 60 mM K-MES, pH 7.1). The respiration buffer for mitochondrial  
476 resuspension did not include taurine, because it is an aminoethane sulfonic acid which contains a  
477 primary amine that could react with the cross-linker. F1 mice resuspension media had taurine. Isolated  
478 mitochondria protein concentration was determined using standard Bradford Assay procedures.

#### 479 *Mitochondrial Respiration.*

480 CI, CII, and CI&CII-linked mitochondrial respiration were assayed in mitochondria isolated from young (6-  
481 mo-old) and old (30-mo-old) female C57Bl6/J mouse gastrocnemius using an Oxygraph 2K dual  
482 respirometer/fluorometer (Oroboros Instruments, Innsbruck, Austria). RB with taurine and BSA was  
483 used for respiration measurements (1.5 mM EGTA, 3 mM MgCl<sub>2</sub>-6H<sub>2</sub>O, 10 mM KH<sub>2</sub>PO<sub>4</sub>, 20 mM HEPES,  
484 110 mM Sucrose, 100 mM Mannitol, 60 mM K-MES, 20 mM taurine, 1 g/L BSA, pH 7.1). Hexokinase  
485 clamp (1 U/ml hexokinase, 2.5 mM D-glucose) was used to maintain equilibrium of ATP/ADP at  
486 submaximal ADP concentrations.<sup>61</sup> Respirometry and fluorometry reagent stocks were prepared  
487 according to Oroboros instructions (bioblast.at). Respiration was measured at 37°C with stirring during  
488 substrate and inhibitor titrations.

489 To measure CI, CII, and CI&CII-linked respiration, first, 10 µM cytochrome c was added to each chamber  
490 to allow measurement of respiration in isolated mitochondria without limiting by membrane damage  
491 occurring during isolation. Approximately 35 µg mitochondrial homogenate (~8-11 µL) was added to  
492 each 2 mL chamber. Complex I (CI), Complex I (CII), and CI&CII-linked respiration were measured in  
493 parallel for each sample by adding complex-specific substrates and inhibitors then titrating in ADP. CI-  
494 linked respiration was measured by adding 10 mM glutamate and 0.5 mM malate. CII-linked respiration  
495 was measured by adding 10 mM succinate and 0.5 µM rotenone. CI&CII-linked respiration was  
496 measured by adding 10 mM succinate, 10 mM glutamate, and 0.5 mM malate. The OXPHOS capacities  
497 for each substrate condition were determined as the maximum oxygen consumption rate (OCR)  
498 measured during a titration of ADP from 5-6000 µM ADP. The background oxygen consumption with de-  
499 energized mitochondria was subtracted from all measured functional parameters before reporting final  
500 values.

501 Response to glutamate and fatty acid titration was measured in mitochondria isolated from 8 young (5-  
502 7-mo-old) and 6 old (33-37-mo-old) male CB6F1 mouse gastrocnemius using the Oxygraph 2K dual  
503 respirometer/fluorometer. RB with taurine and BSA was used for respiration measurements without  
504 hexokinase clamp because saturating ADP concentrations were added to the chambers in a single bolus

505 during the experiment. To measure glutamate sensitivity, a sequential titration of 50 µg mitochondrial  
506 protein, 2.5 mM ADP, 10 µM cytochrome c, and sequential additions of 1 mM glutamate up to 10 mM  
507 glutamate final concentration were performed. To measure fatty acid utilization, a sequential titration of  
508 50 µg mitochondrial protein, 2 mM malate, 2.5 mM ADP, 10 µM cytochrome c, and sequential additions  
509 of 10 µM palmitoyl-carnitine up to 100 µM palmitoyl-carnitine final concentration were performed.

510 The mitochondrial respiration results were analyzed using Microsoft Office Excel and GraphPad Prism  
511 9.9 for Mac OS X (GraphPad Software, La Jolla, CA). For all comparisons,  $P < 0.05$  was considered  
512 statistically significant. Comparisons between two groups were analyzed using unpaired two-tailed  
513 student's t-test. Comparisons during ADP titrations were analyzed using repeated measures Two-way  
514 ANOVA with Sidak's multiple comparisons. Comparisons during glutamate and palmitoyl-carnitine  
515 titrations in CB6F1 mice were analyzed using mixed-effects analysis with Sidak's multiple comparisons.  
516 Plots depict mean  $\pm$  standard deviation

#### 517 *Citrate Synthase Activity Assay.*

518 Citrate Synthase (CS) activity is reportedly a more accurate marker of mitochondrial mass than total  
519 protein content when performing comparisons across age<sup>21</sup>. CS activity assay was performed on  
520 mitochondrial isolations and used to normalize mitochondrial respiration. CS Activity was measured by  
521 spectrometric quantitation (412 nm) of 5,5'-dithiobis-2-nitrobenzoic acid conversion to 2-nitro-5-  
522 thiobenzoic acid in the presence of Coenzyme A thiol generated during citrate production (CS0720,  
523 Sigma) as previously described.<sup>62</sup>

#### 524 *Cross-linking of isolated muscle mitochondria.*

525 Isolated mitochondria from murine gastrocnemius muscles of 8 mice (4 young and 4 old) were  
526 resuspended in cross-linking buffer (170 mM Na<sub>2</sub>HPO<sub>4</sub>, pH 8.0) and either reporter heavy (RH) or stump  
527 heavy (SH) iqPIR reagent was added;<sup>15</sup> final reaction volume was 100 µL and cross-linker concentration  
528 was 10 mM. Cross-linking reaction was allowed to proceed for 30 min at room temperature with  
529 shaking. Cross-linking buffer was then removed by centrifugation and mitochondrial pellets were lysed  
530 in 8M urea. Proteins were reduced with TCEP (30 min RT with shaking) and alkylated with IAA (30 min RT  
531 with shaking). Protein concentration of each mitochondrial sample was measured with a Bradford assay  
532 using Cytation plate reader. Samples were mixed pairwise (one old and one young, **Supp. Table 4**) using  
533 equal amount of protein from each sample making 4 biological replicates total. Protein mixtures were  
534 digested with trypsin overnight (1:100 trypsin concentration at 37 C with shaking). Peptides were then  
535 acidified with TFA and cleaned using seppak c18 columns (Waters). Peptides were separated using SCX  
536 chromatography (Luna column, Agilent HPLC) into 14 fractions and fractions were pooled together as  
537 following: fractions 1 to 5, fractions 6 and 7, fraction 8, fraction 9, fraction10, fractions 11 to 14. Pooled  
538 fractions were dried in a SpeedVac and resuspended in ammonium bicarbonate buffer; pH was adjusted  
539 to 8.0 with NaOH. Biotinylated cross-linked peptides were captured with monomeric avidin  
540 (ThermoFisher Scientific 20228) for 30 min at RT with shaking. The beads were washed with ammonium  
541 bicarbonate and peptides were eluted with 0.1% formic acid in 70% ACN, dried down by vacuum  
542 centrifugation and resuspended in 20 µL of 0.1% formic acid.

#### 543 *Mitochondrial isolation from HEK293 cells and treatment with ADP.*

544 HEK293 cells were grown in DMEM media supplemented with 3.5 mg/L glucose, 10% fetal bovine serum,  
545 1% penicillin and streptomycin to confluency. The plates were washed with PBS, cells detached using  
546 EDTA 20 mM, centrifuged and washed twice in MgCl<sub>2</sub>. Cells were then resuspended in ice-cold  
547 mitochondrial isolation buffer (70 mM sucrose, 220 mM D-mannitol, 5 mM MOPS, 1.6 mM carnitine, 1  
548 mM EDTA at pH 7.4) and homogenized in a glass homogenizer. The homogenate was centrifuged at 600  
549 g for 5 min at 4 C. The supernatant was transferred to a 15 mL tube and centrifuged at 8000 g for 10 min  
550 at 4 C. The supernatant was then removed, and mitochondrial pellet was resuspended in 5 mL of  
551 mitochondrial isolation buffer and centrifuged at 8000 g for 10 min. The mitochondrial pellet was then  
552 resuspended in 200 uL of mitochondrial isolation buffer and split into two. ADP was added to one vial to  
553 a final concentration of 1.5 mM. Both samples were incubated at RT for 10 min with shaking.  
554 Supernatant was then removed by centrifugation and pellets were resuspended in cross-linking buffer.  
555 RH iqPIR cross-linker and ADP was added to ADP treated sample to final concentrations of 10 and 1.5  
556 mM respectively. SH iqPIR cross-linker was added to control sample to a final concentration of 10 mM.  
557 The cross-linking reaction was allowed to proceed for 30 min at RT with shaking. The supernatant was  
558 then removed by centrifugation and mitochondrial pellets were lysed, reduced, alkylated, combined,  
559 digested and processed for mass spectrometric analysis the same way as murine muscle mitochondria.

#### 560 *Mass Spectrometry and data analysis.*

561 Four uL of each pooled fraction was loaded on a 60 cm C8 heated column and separated on 2 hour  
562 gradient on nanoAcquity HPLC system (Waters) and analyzed with QExactive Plus mass spectrometer  
563 (ThermoFisher Scientific). MS1 scans were analyzed at 70K resolution with AGC target 1e6, and  
564 maximum ion time 100 ms. Top 5 peaks with charge 4 or greater were selected for HCD fragmentation  
565 with NCE 30 and MS2 spectra were collected at 70K resolution, 5e4 AGC target, and 300 ms maximum  
566 ion time.

567 Raw files were converted to mzXML, and spectra containing cross-linked peptides were determined with  
568 Mango software.<sup>63</sup> These spectra were then searched against mouse Mitocarta 2.0 database using  
569 Comet<sup>64</sup> search engine and cross-linked peptides were validated with XLinkProphet.<sup>65</sup> Identified cross-  
570 links were quantified using iqPIR algorithm and results were uploaded to XLinkDB database.<sup>18</sup>  
571 Normalized log<sub>2</sub> ratios and associated p-values based on the Student's t-test on each quantified ion for  
572 every cross-link ( $t = \text{sqrt}(\text{df} * \text{mean} / \text{std})$ ) and p-values calculated with the pt function of R:  $\text{pt}(-\text{abs}(t), \text{df})$   
573 where t is the t-statistic and df the degrees of freedom) were downloaded from XLinkDB and correlation  
574 plots between biological replicates, density plots for each replicate, volcano plot indicating significantly  
575 changed cross-links, box-plots and t-test comparisons were generated in R using tidyverse package and  
576 R markdown is provided.<sup>66</sup> In all boxplots horizontal line represents median, the lower and upper hinges  
577 correspond to the first and third quartiles (the 25th and 75th percentiles) and the whiskers extend to  
578 the value no further than 1.5 IQR. Pathway enrichment analysis and network of differentially expressed  
579 cross-links were generated using STRING web-application.<sup>67</sup> Heatmap of all common cross-links was  
580 generated for cross-links quantified with 95% confidence (interval within which one can be sure with  
581 95% confidence that the actual mean value resides, calculated as  $1.96 * \text{std} / \text{sqrt}(\text{num\_reps})$  assuming  
582 normal distribution) less than 0.5 in all 4 biological replicates using NG-CHM builder web application.<sup>68</sup>  
583 Heat maps for cross-links in specific proteins or protein complexes were generated in XLinkDB. Cross-  
584 links were mapped on available structures with either Euclidean distances or SASD distances calculated  
585 by Jwalk.<sup>69</sup>

586 **Data and code availability**

587 Mass spectrometry data have been deposited to ProteomeXchange Consortium via PRIDE repository  
588 with identifiers PXD031643 and PXD031644. R markdown used for statistical analysis and figure  
589 generation is available at [https://github.com/brucelab/aging\\_mito\\_interactome\\_data\\_analysis](https://github.com/brucelab/aging_mito_interactome_data_analysis).

590 **Acknowledgments**

591 Figures were created with BioRender.com. Authors are grateful to members of the Bruce lab for helpful  
592 discussion. This work was funded by NIH grants P01-AG001751, R56-AG070096, T32 AG066574,  
593 R35GM136255, and R01HL144778.

594 **Extended Data**

| Biorep | Mito yield | CS activity | CI oxphos | CII oxphos |
|--------|------------|-------------|-----------|------------|
| P1     | -0.712     | 0.712       | 0.441     | -0.667     |
| P2     | -0.878     | 0.918       | -2.1      | -0.788     |
| P3     | -1.282     | 0.932       | -0.933    | 0.107      |
| P4     | -1.417     | 1.186       | -1.369    | -0.697     |

595

596 **Supplemental Table 3.** Log<sub>2</sub> fold change calculated for each paired biological replicate in mitochondrial  
597 yield, citrate synthase (CS) activity, ad oxygen consumption on either CI substrates or CII substrates.

| Biorep | Old mouse # | Young mouse # |
|--------|-------------|---------------|
| P1     | 1           | 2             |
| P2     | 2           | 3             |
| P3     | 3           | 1             |
| P4     | 4           | 4             |

598

599 **Supplemental Table 4.** Pairwise combinations of old and young mitochondria to create 4 biological  
600 replicates (mice numbered the same way as in functional data). Pairs were assigned based on amount of  
601 available protein to maximize input material.

602

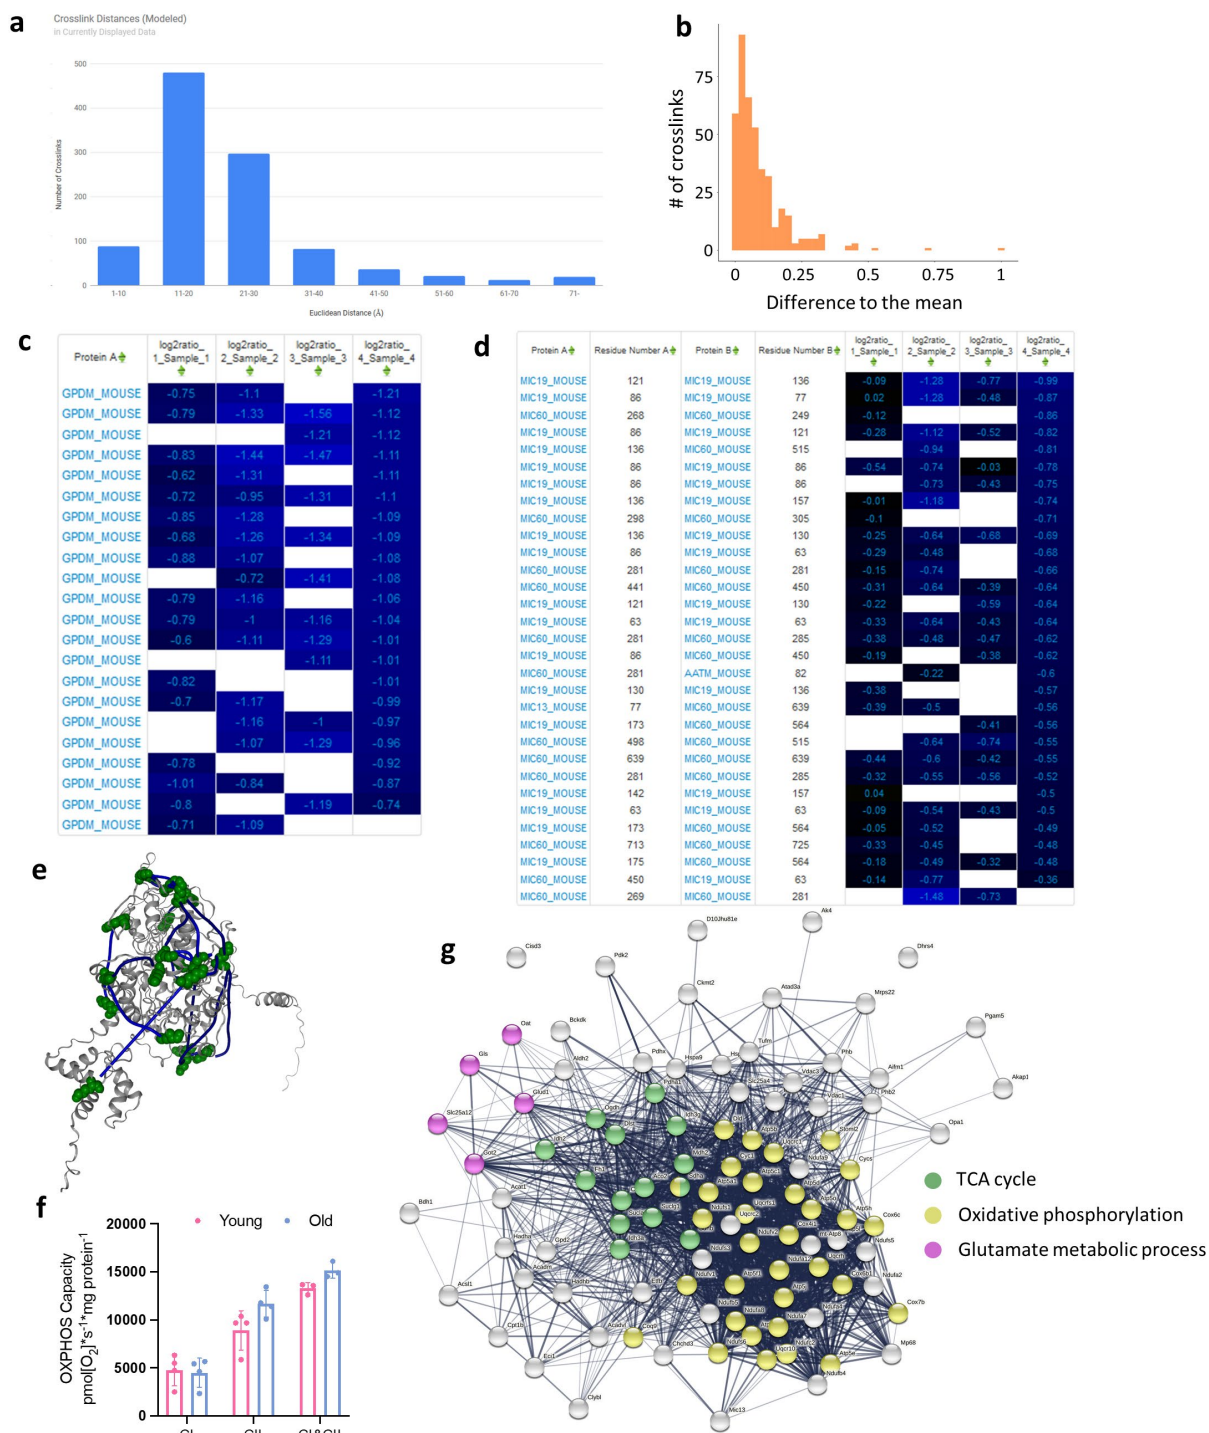

603

604 **Extended data figure S1. a** Histogram of calculated Euclidean distances for all intraprotein cross-links  
 605 mapped to AlphaFold predicted structures. **b.** Histogram of differences between a mean log2 ratios for  
 606 cross-linked residue pairs based on multiple cross-linked peptides (cross-links that connect the same  
 607 lysines, but can be identified in differently cleaved or modified peptides) and each cross-linked peptide  
 608 pair **c.** Heatmap of log2 ratios of GPDH Intralinks in 4 biological replicates. **d.** Heatmap of log2 ratios of  
 609 MICOS complex subunits intra- and interprotein links. **e.** GPDH Intralinks mapped to an AlphaFold

610 predicted structure. **f.** Oxphos capacity normalized by protein amount. **g.** STRING network of proteins  
 611 with significantly changed cross-links.

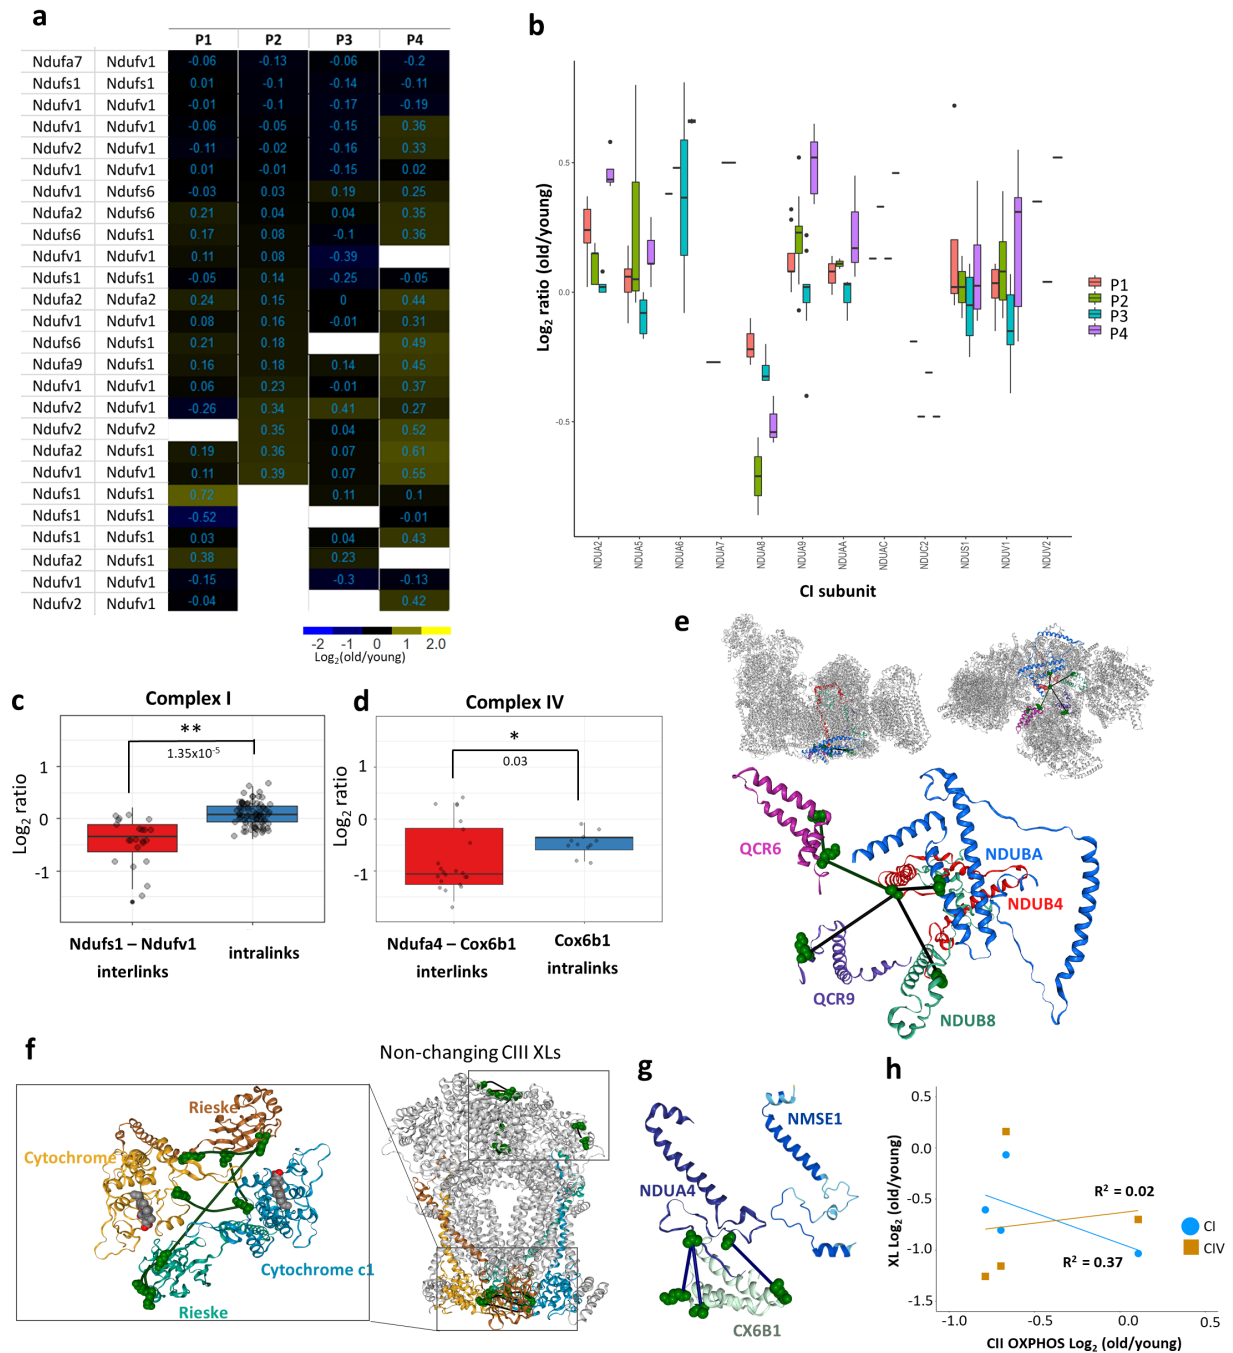

612

613 **Extended data figure S2. a.** Heatmap of log<sub>2</sub> ratios of all NDUS1 and NDUV1 crosslinks cross-links and  
 614 interprotein crosslinks to other CI subunits. **b.** Boxplots of all intralinks in Complex I subunits by a  
 615 biological replicate. **c,d.** Boxplots of crosslinks downregulated in aging and non-changing Intralinks based  
 616 on all 4 biological replicates for CI and CIV respectively. P-values are from Welch t-test and significance  
 617 (\*\* for 0.01 and \* for 0.05). **e.** Structure of supercomplex with cross-linked CI and CIII subunits  
 618 highlighted (top) and specific CI-CIII crosslinks mapped to the subunits (bottom); decreased crosslinked

619 are in green. **f.** Complex III crosslinks mapped to a bovine structure. Subunits with decreased intralinks  
 620 highlighted and zoomed in (right). **g.** AlphaFold predicted structure of human NMSE1, that is reported  
 621 to replace NDUA4 subunit in complex IV during inflammation, and cryo-EM structure of CX6B1 and  
 622 NDUA4 in CIV. **h.** Correlation plots of CI and CIV cross-links changing in aging mitochondria and Complex  
 623 II OXPPOS.

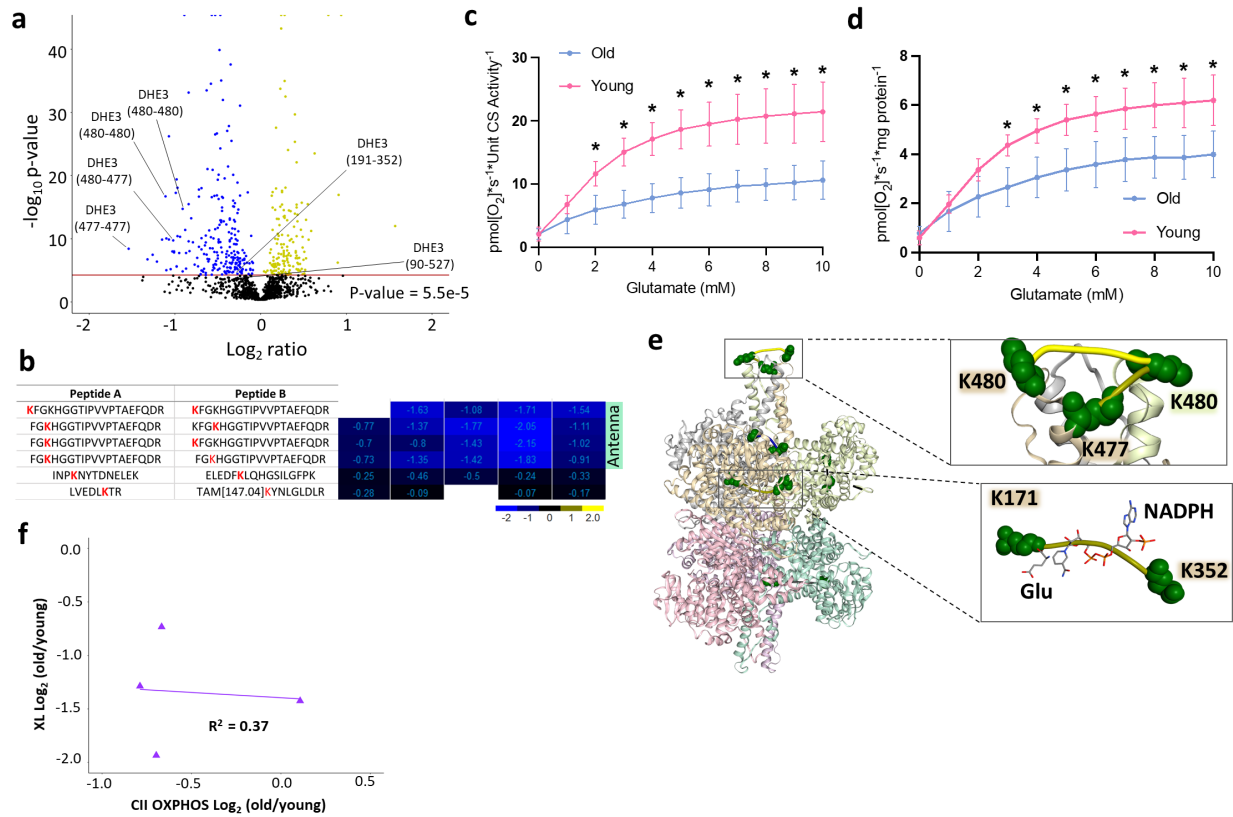

624

625 **Extended data figure S3. a.** Decreased and non-changing cross-link levels in glutamate dehydrogenase  
 626 highlighted on the volcano plot with Bonferroni corrected p-value = 0.05. **b.** Heatmap of all DHE3 cross-  
 627 linked peptide pairs with each individual peptide sequence shown. Cross-linked lysine residues are in  
 628 red. **c, d.** Glutamate sensitivity assay as measured by oxygen consumption determined with glutamate  
 629 titration and normalized by citrate synthase activity or mitochondrial protein amount. **e.** Antenna cross-  
 630 links increased with activation by ADP treatment of isolated HEK293 mitochondria mapped to 6DHM  
 631 structure. Cross-link spanning active site (K171-K352) shows slight upregulation indicating possible  
 632 destabilization of abortive complex by ADP. **f.** Correlation plots of DHE3 antenna cross-links changing in  
 633 aging mitochondria and Complex II OXPPOS.

634

635

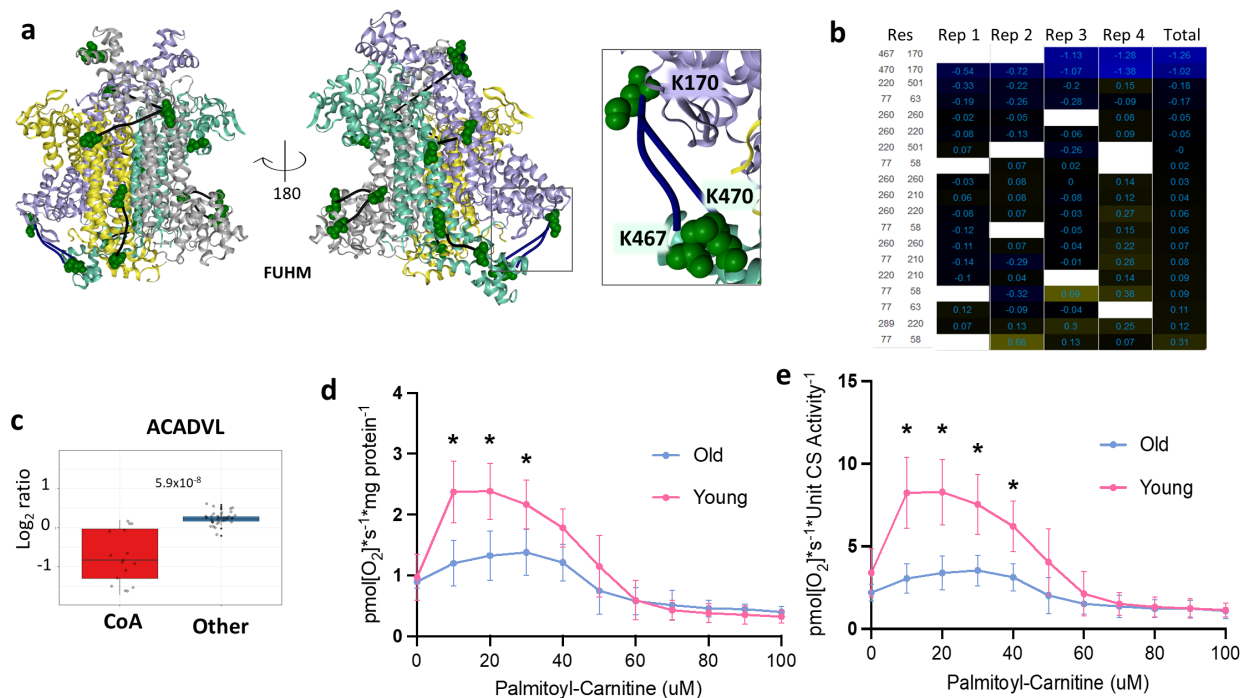

636

637 **Extended data figure S4. a.** Fumarate hydratase cross-links mapped to a E.Coli structure. Decreased  
 638 cross-link levels are shown in the zoomed in square. **b.** Heatmap of log2 ratios of fumarate hydratase  
 639 cross-links. **c.** Boxplots for Acadvl cross-links based on all 4 biological replicates. **d,e.** Palmitoyl-carnitine  
 640 sensitivity in female F1 mice normalized by mitochondrial protein amount or CS activity.

641

- 642 1 López-Otín, C., Blasco, M. A., Partridge, L., Serrano, M. & Kroemer, G. The hallmarks  
 643 of aging. *Cell* **153**, 1194-1217, doi:10.1016/j.cell.2013.05.039 (2013).
- 644 2 Harman, D. Aging: a theory based on free radical and radiation chemistry. *Journal of*  
 645 *Gerontology* **11**, 298-300, doi:10.1093/geronj/11.3.298 (1956).
- 646 3 Peterson, C. M., Johannsen, D. L. & Ravussin, E. Skeletal Muscle Mitochondria and  
 647 Aging: A Review. *Journal of Aging Research* **2012**, 1-20, doi:10.1155/2012/194821  
 648 (2012).
- 649 4 Sun, N., Youle, R. J. & Finkel, T. The Mitochondrial Basis of Aging. *Mol Cell* **61**, 654-  
 650 666, doi:10.1016/j.molcel.2016.01.028 (2016).
- 651 5 Short, K. R. *et al.* Decline in skeletal muscle mitochondrial function with aging in  
 652 humans. *Proceedings of the National Academy of Sciences* **102**, 5618-5623,  
 653 doi:10.1073/pnas.0501559102 (2005).
- 654 6 Hepple, R. T. Mitochondrial Involvement and Impact in Aging Skeletal Muscle.  
 655 *Frontiers in Aging Neuroscience* **6**, doi:10.3389/fnagi.2014.00211 (2014).
- 656 7 Ubaida-Mohien, C. *et al.* Discovery proteomics in aging human skeletal muscle finds  
 657 change in spliceosome, immunity, proteostasis and mitochondria. *eLife* **8**, e49874,  
 658 doi:10.7554/eLife.49874 (2019).



- 659 8 Tumasian, R. A. *et al.* Skeletal muscle transcriptome in healthy aging. *Nature*  
660 *Communications* **12**, 2014, doi:10.1038/s41467-021-22168-2 (2021).
- 661 9 Hwang, C. Y. *et al.* Quantitative proteome analysis of age-related changes in mouse  
662 gastrocnemius muscle using mTRAQ. *PROTEOMICS* **14**, 121-132,  
663 doi:10.1002/pmic.201200497 (2014).
- 664 10 Hunt, L. C. *et al.* Integrated genomic and proteomic analyses identify stimulus-dependent  
665 molecular changes associated with distinct modes of skeletal muscle atrophy. *Cell*  
666 *Reports* **37**, 109971, doi:10.1016/j.celrep.2021.109971 (2021).
- 667 11 Yu, Q. *et al.* Sample multiplexing for targeted pathway proteomics in aging mice.  
668 *Proceedings of the National Academy of Sciences* **117**, 9723-9732,  
669 doi:10.1073/pnas.1919410117 (2020).
- 670 12 Yeo, D., Kang, C. & Ji, L. L. Aging alters acetylation status in skeletal and cardiac  
671 muscles. *GeroScience* **42**, 963-976, doi:10.1007/s11357-020-00171-7 (2020).
- 672 13 Wagner, G. R. & Payne, R. M. Mitochondrial Acetylation and Diseases of Aging.  
673 *Journal of Aging Research* **2011**, 1-13, doi:10.4061/2011/234875 (2011).
- 674 14 Hofer, A. & Wenz, T. Post-translational modification of mitochondria as a novel mode of  
675 regulation. *Experimental Gerontology* **56**, 202-220, doi:10.1016/j.exger.2014.03.006  
676 (2014).
- 677 15 Chavez, J. D., Keller, A., Mohr, J. P. & Bruce, J. E. Isobaric Quantitative Protein  
678 Interaction Reporter Technology for Comparative Interactome Studies. *Analytical*  
679 *Chemistry*, acs.analchem.0c03128, doi:10.1021/acs.analchem.0c03128 (2020).
- 680 16 Müller, C. S. *et al.* Cryo-slicing Blue Native-Mass Spectrometry (csBN-MS), a Novel  
681 Technology for High Resolution Complexome Profiling. *Mol Cell Proteomics* **15**, 669-  
682 681, doi:10.1074/mcp.M115.054080 (2016).
- 683 17 Chavez, J. D. *et al.* A General Method for Targeted Quantitative Cross-Linking Mass  
684 Spectrometry. *PLoS One* **11**, e0167547, doi:10.1371/journal.pone.0167547 (2016).
- 685 18 Keller, A., Chavez, J. D., Eng, J. K., Thornton, Z. & Bruce, J. E. Tools for 3D  
686 Interactome Visualization. *Journal of Proteome Research* **18**, 753-758,  
687 doi:10.1021/acs.jproteome.8b00703 (2019).
- 688 19 Jumper, J. *et al.* Highly accurate protein structure prediction with AlphaFold. *Nature* **596**,  
689 583-589, doi:10.1038/s41586-021-03819-2 (2021).
- 690 20 Rath, S. *et al.* MitoCarta3.0: an updated mitochondrial proteome now with sub-organelle  
691 localization and pathway annotations. *Nucleic Acids Research* **49**, D1541-D1547,  
692 doi:10.1093/nar/gkaa1011 (2021).
- 693 21 Figueiredo, P. A., Ferreira, R. M., Appell, H. J. & Duarte, J. A. Age-induced  
694 morphological, biochemical, and functional alterations in isolated mitochondria from  
695 murine skeletal muscle. *The Journals of Gerontology. Series A, Biological Sciences and*  
696 *Medical Sciences* **63**, 350-359, doi:10.1093/gerona/63.4.350 (2008).
- 697 22 Taleux, N. *et al.* High Expression of Thyroid Hormone Receptors and Mitochondrial  
698 Glycerol-3-phosphate Dehydrogenase in the Liver Is Linked to Enhanced Fatty Acid  
699 Oxidation in Lou/C, a Rat Strain Resistant to Obesity. *Journal of Biological Chemistry*  
700 **284**, 4308-4316, doi:10.1074/jbc.M806187200 (2009).
- 701 23 Liu, X. *et al.* Mitochondrial glycerol 3-phosphate dehydrogenase promotes skeletal  
702 muscle regeneration. *EMBO Molecular Medicine* **10**, doi:10.15252/emmm.201809390  
703 (2018).

- 704 24 Mráček, T., Drahota, Z. & Houštěk, J. The function and the role of the mitochondrial  
705 glycerol-3-phosphate dehydrogenase in mammalian tissues. *Biochimica et Biophysica*  
706 *Acta (BBA) - Bioenergetics* **1827**, 401-410, doi:10.1016/j.bbabo.2012.11.014 (2013).
- 707 25 Li, H. *et al.* Mic60/Mitofilin determines MICOS assembly essential for mitochondrial  
708 dynamics and mtDNA nucleoid organization. *Cell Death & Differentiation* **23**, 380-392,  
709 doi:10.1038/cdd.2015.102 (2016).
- 710 26 Friedman, J. R., Mourier, A., Yamada, J., McCaffery, J. M. & Nunnari, J. MICOS  
711 coordinates with respiratory complexes and lipids to establish mitochondrial inner  
712 membrane architecture. *eLife* **4**, e07739, doi:10.7554/eLife.07739 (2015).
- 713 27 Han, Y. *et al.* Transcriptome features of striated muscle aging and predictability of  
714 protein level changes. *Molecular Omics* **17**, 796-808, doi:10.1039/D1MO00178G (2021).
- 715 28 Wiley, C. D. & Campisi, J. The metabolic roots of senescence: mechanisms and  
716 opportunities for intervention. *Nature Metabolism* **3**, 1290-1301, doi:10.1038/s42255-  
717 021-00483-8 (2021).
- 718 29 Sánchez-Caballero, L., Guerrero-Castillo, S. & Nijtmans, L. Unraveling the complexity  
719 of mitochondrial complex I assembly: A dynamic process. *Biochimica et Biophysica Acta*  
720 *(BBA) - Bioenergetics* **1857**, 980-990, doi:10.1016/j.bbabo.2016.03.031 (2016).
- 721 30 Park, J. *et al.* SIRT5-Mediated Lysine Desuccinylation Impacts Diverse Metabolic  
722 Pathways. *Molecular Cell* **50**, 919-930, doi:10.1016/j.molcel.2013.06.001 (2013).
- 723 31 Yang, W. *et al.* Mitochondrial Sirtuin Network Reveals Dynamic SIRT3-Dependent  
724 Deacetylation in Response to Membrane Depolarization. *Cell* **167**, 985-1000.e1021,  
725 doi:10.1016/j.cell.2016.10.016 (2016).
- 726 32 Guerrero-Castillo, S. *et al.* The Assembly Pathway of Mitochondrial Respiratory Chain  
727 Complex I. *Cell Metabolism* **25**, 128-139, doi:10.1016/j.cmet.2016.09.002 (2017).
- 728 33 Szczepanowska, K. *et al.* A salvage pathway maintains highly functional respiratory  
729 complex I. *Nat Commun* **11**, 1643, doi:10.1038/s41467-020-15467-7 (2020).
- 730 34 Miwa, S. *et al.* Low abundance of the matrix arm of complex I in mitochondria predicts  
731 longevity in mice. *Nature Communications* **5**, 3837, doi:10.1038/ncomms4837 (2014).
- 732 35 Kruse, S. E. *et al.* Age modifies respiratory complex I and protein homeostasis in a  
733 muscle type-specific manner. *Aging Cell* **15**, 89-99, doi:10.1111/accel.12412 (2016).
- 734 36 Protasoni, M. *et al.* Respiratory supercomplexes act as a platform for complex III-  
735 mediated maturation of human  
736 mitochondrial complexes I and IV. *The*  
737 *EMBO Journal* **39**, doi:10.15252/embj.2019102817 (2020).
- 738 37 Balsa, E. *et al.* NDUFA4 Is a Subunit of Complex IV of the Mammalian Electron  
739 Transport Chain. *Cell Metabolism* **16**, 378-386, doi:10.1016/j.cmet.2012.07.015 (2012).
- 740 38 Zong, S. *et al.* Structure of the intact 14-subunit human cytochrome c oxidase. *Cell*  
741 *Research* **28**, 1026-1034, doi:10.1038/s41422-018-0071-1 (2018).
- 742 39 Smith, H. Q., Li, C., Stanley, C. A. & Smith, T. J. Glutamate Dehydrogenase, a Complex  
743 Enzyme at a Crucial Metabolic Branch Point. *Neurochemical Research* **44**, 117-132,  
744 doi:10.1007/s11064-017-2428-0 (2019).
- 745 40 Hamelin, M., Mary, J., Vostry, M., Friguet, B. & Bakala, H. Glycation damage targets  
746 glutamate dehydrogenase in the rat liver mitochondrial matrix during aging: Glycation of  
747 glutamate dehydrogenase with aging. *FEBS Journal* **274**, 5949-5961, doi:10.1111/j.1742-  
748 4658.2007.06118.x (2007).

- 749 41 Li, M., Li, C., Allen, A., Stanley, C. A. & Smith, T. J. The structure and allosteric  
750 regulation of mammalian glutamate dehydrogenase. *Archives of Biochemistry and*  
751 *Biophysics* **519**, 69-80, doi:10.1016/j.abb.2011.10.015 (2012).
- 752 42 Banerjee, S., Schmidt, T., Fang, J., Stanley, C. A. & Smith, T. J. Structural Studies on  
753 ADP Activation of Mammalian Glutamate Dehydrogenase and the Evolution of  
754 Regulation <sup>,</sup>. *Biochemistry* **42**, 3446-3456, doi:10.1021/bi0206917 (2003).
- 755 43 Hyyti, O. M., Ledee, D., Ning, X.-H., Ge, M. & Portman, M. A. Aging impairs  
756 myocardial fatty acid and ketone oxidation and modifies cardiac functional and metabolic  
757 responses to insulin in mice. *American Journal of Physiology-Heart and Circulatory*  
758 *Physiology* **299**, H868-H875, doi:10.1152/ajpheart.00931.2009 (2010).
- 759 44 Houtkooper, R. H. *et al.* The metabolic footprint of aging in mice. *Scientific Reports* **1**,  
760 134, doi:10.1038/srep00134 (2011).
- 761 45 Zhang, X. *et al.* Impaired Mitochondrial Energetics Characterize Poor Early Recovery of  
762 Muscle Mass Following Hind Limb Unloading in Old Mice. *The Journals of*  
763 *Gerontology: Series A* **73**, 1313-1322, doi:10.1093/gerona/gly051 (2018).
- 764 46 Fan, J. *et al.* Tetrameric Acetyl-CoA Acetyltransferase 1 Is Important for Tumor Growth.  
765 *Molecular Cell* **64**, 859-874, doi:10.1016/j.molcel.2016.10.014 (2016).
- 766 47 Wu, B. *et al.* Succinyl-CoA Ligase Deficiency in Pro-inflammatory and Tissue-Invasive  
767 T Cells. *Cell Metabolism* **32**, 967-980.e965, doi:10.1016/j.cmet.2020.10.025 (2020).
- 768 48 Hayflick, L. The greatest risk factor for the leading cause of death is ignored.  
769 *Biogerontology* **22**, 133-141, doi:10.1007/s10522-020-09901-y (2021).
- 770 49 Asadi Shahmirzadi, A. *et al.* Alpha-Ketoglutarate, an Endogenous Metabolite, Extends  
771 Lifespan and Compresses Morbidity in Aging Mice. *Cell Metabolism* **32**, 447-456.e446,  
772 doi:10.1016/j.cmet.2020.08.004 (2020).
- 773 50 Su, Y. *et al.* Alpha-ketoglutarate extends Drosophila lifespan by inhibiting mTOR and  
774 activating AMPK. *Aging* **11**, 4183-4197, doi:10.18632/aging.102045 (2019).
- 775 51 Kaeberlein, M., Burtner, C. R. & Kennedy, B. K. Recent Developments in Yeast Aging.  
776 *PLoS Genetics* **3**, e84, doi:10.1371/journal.pgen.0030084 (2007).
- 777 52 Chin, R. M. *et al.* The metabolite  $\alpha$ -ketoglutarate extends lifespan by inhibiting ATP  
778 synthase and TOR. *Nature* **510**, 397-401, doi:10.1038/nature13264 (2014).
- 779 53 Hagopian, K. Caloric restriction increases gluconeogenic and transaminase enzyme  
780 activities in mouse liver. *Experimental Gerontology* **38**, 267-278, doi:10.1016/S0531-  
781 5565(02)00202-4 (2003).
- 782 54 Lyu, Y. *et al.* Drosophila serotonin 2A receptor signaling coordinates central metabolic  
783 processes to modulate aging in response to nutrient choice. *eLife* **10**, e59399,  
784 doi:10.7554/eLife.59399 (2021).
- 785 55 Lombardi, A. A. *et al.* Mitochondrial calcium exchange links metabolism with the  
786 epigenome to control cellular differentiation. *Nature Communications* **10**, 4509,  
787 doi:10.1038/s41467-019-12103-x (2019).
- 788 56 Rardin, M. J. *et al.* Label-free quantitative proteomics of the lysine acetylome in  
789 mitochondria identifies substrates of SIRT3 in metabolic pathways. *Proceedings of the*  
790 *National Academy of Sciences* **110**, 6601-6606, doi:10.1073/pnas.1302961110 (2013).
- 791 57 Mimaki, M., Wang, X., McKenzie, M., Thorburn, D. R. & Ryan, M. T. Understanding  
792 mitochondrial complex I assembly in health and disease. *Biochim Biophys Acta* **1817**,  
793 851-862, doi:10.1016/j.bbabo.2011.08.010 (2012).

- 794 58 Martínez-Reyes, I. & Chandel, N. S. Mitochondrial TCA cycle metabolites control  
795 physiology and disease. *Nat Commun* **11**, 102, doi:10.1038/s41467-019-13668-3 (2020).
- 796 59 Lee, S.-H., Lee, S.-K., Paik, D. & Min, K.-J. Overexpression of Fatty-Acid-  $\beta$  -  
797 Oxidation-Related Genes Extends the Lifespan of *Drosophila melanogaster*.  
798 *Oxidative Medicine and Cellular Longevity* **2012**, 1-8, doi:10.1155/2012/854502 (2012).
- 799 60 Nguyen, D., Samson, S. L., Reddy, V. T., Gonzalez, E. V. & Sekhar, R. V. Impaired  
800 mitochondrial fatty acid oxidation and insulin resistance in aging: novel protective role of  
801 glutathione. *Aging Cell* **12**, 415-425, doi:10.1111/accel.12073 (2013).
- 802 61 Lark, D. S. *et al.* Direct real-time quantification of mitochondrial oxidative  
803 phosphorylation efficiency in permeabilized skeletal muscle myofibers. *American*  
804 *Journal of Physiology. Cell Physiology* **311**, C239-245, doi:10.1152/ajpcell.00124.2016  
805 (2016).
- 806 62 Crouch, M.-L. *et al.* Cyclophosphamide leads to persistent deficits in physical  
807 performance and in vivo mitochondria function in a mouse model of chemotherapy late  
808 effects. *PLoS One* **12**, e0181086, doi:10.1371/journal.pone.0181086 (2017).
- 809 63 Mohr, J. P., Perumalla, P., Chavez, J. D., Eng, J. K. & Bruce, J. E. Mango: A General  
810 Tool for Collision Induced Dissociation-Cleavable Cross-Linked Peptide Identification.  
811 *Analytical Chemistry* **90**, 6028-6034, doi:10.1021/acs.analchem.7b04991 (2018).
- 812 64 Eng, J. K., Jahan, T. A. & Hoopmann, M. R. Comet: An open-source MS/MS sequence  
813 database search tool. *PROTEOMICS* **13**, 22-24, doi:10.1002/pmic.201200439 (2013).
- 814 65 Keller, A., Chavez, J. D. & Bruce, J. E. Increased sensitivity with automated validation of  
815 XL-MS cleavable peptide crosslinks. *Bioinformatics (Oxford, England)* **35**, 895-897,  
816 doi:10.1093/bioinformatics/bty720 (2019).
- 817 66 Wickham, H. *et al.* Welcome to the Tidyverse. *Journal of Open Source Software* **4**, 1686,  
818 doi:10.21105/joss.01686 (2019).
- 819 67 Szklarczyk, D. *et al.* The STRING database in 2021: customizable protein-protein  
820 networks, and functional characterization of user-uploaded gene/measurement sets.  
821 *Nucleic Acids Research* **49**, D605-D612, doi:10.1093/nar/gkaa1074 (2021).
- 822 68 Ryan, M. C. *et al.* Interactive Clustered Heat Map Builder: An easy web-based tool for  
823 creating sophisticated clustered heat maps. *F1000Research* **8**, 1750,  
824 doi:10.12688/f1000research.20590.2 (2020).
- 825 69 Bullock, J. M. A., Thalassinou, K. & Topf, M. Jwalk and MNXL web server: model  
826 validation using restraints from crosslinking mass spectrometry. *Bioinformatics* **34**, 3584-  
827 3585, doi:10.1093/bioinformatics/bty366 (2018).
